# Supplementary material for: Upfront Next Generation Sequencing in Non-Small Cell Lung Cancer
Source: MDPI journal article supplement (doi:10.3390/curroncol29070352), 2022-06-22
Supplement: s1 [file s1]

Supplementary Data S2. Variants detected using TST15.

| Gene Variant | Type      | Alteration and VAF                     |
|--------------|-----------|----------------------------------------|
| AKT          | GLU17LYS  | c.49G>A (p.Glu17Lys) 25%               |
| AKT          | GLU17LYS  | c.49G>A (p.Glu17Lys) 9%                |
| AKT          | GLU17LYS  | c.49G>A (p.Glu17Lys) 16%               |
| BRAF         | NON-V600E | c.1742A>T (p.Asn581Ile) 8%             |
| BRAF         | NON-V600E | c.1756G>A (p.Glu586Lys) 12%            |
| BRAF         | NON-V600E | c.1786G>C (p.Gly596Arg) 47%            |
| BRAF         | NON-V600E | c.1756G>A (p.Glu586Lys) 58%            |
| BRAF         | NON-V600E | c.1798_1799delGTinsAA (p.Val600Lys) 8% |
| BRAF         | NON-V600E | c.1781A>C (p.Asp594Ala) 12%            |
| BRAF         | NON-V600E | c.1803A>C (p.Lys601Asn) 39%            |
| BRAF         | NON-V600E | c.1790T>G (p.Leu597Arg) 42%            |
| BRAF         | NON-V600E | c.1801A>G (p.Lys601Glu) 14%            |
| BRAF         | NON-V600E | c.1803A>T (p.Lys601Asn)                |
| BRAF         | NON-V600E | c.1801A>G (p.Lys601Glu) 25%            |
| BRAF         | V600E     | c.1799T>A (p.Val600Glu) 38%            |
| BRAF         | V600E     | c.1799T>A (p.Val600Glu) 18%            |
| BRAF         | V600E     | c.1799T>A (p.Val600Glu) 47%            |
| BRAF         | V600E     | c.1799T>A (p.Val600Glu) 12%            |
| BRAF         | V600E     | c.1799T>A (p.Val600Glu) 43%            |
| BRAF         | V600E     | c.1799T>A (p.Val600Glu) 25%            |
| BRAF         | V600E     | c.1799T>A (p.Val600Glu) 20%            |
| BRAF         | V600E     | c.1799T>A (p.Val600Glu)                |
| BRAF         | V600E     | c.1799T>A (p.Val600Glu) 27%            |
| BRAF         | V600E     | c.1799T>A (p.Val600Glu) 27%            |
| BRAF         | V600E     | c.1799T>A (p.Val600Glu) 15%            |
| BRAF         | V600E     | c.1799T>A (p.Val600Glu) 20%            |
| BRAF         | V600E     | c.1799T>A (p.Val600Glu) 11%            |
| BRAF         | V600E     | c.1799T>A (p.Val600Glu)                |
| BRAF         | V600E     | c.1799T>A (p.Val600Glu) 28%            |
| BRAF         | V600E     | c.1799T>A (p.Val600Glu) 27%            |
| BRAF         | V600E     | c.1799T>A (p.Val600Glu) 17%            |
| BRAF         | V600E     | c.1799T>A (p.Val600Glu)                |
| EGFR         | C797S     | c.2389T>A (p.Cys797Ser) 14%            |
| EGFR         | EXON 18   | c.2156G>C (p.Gly719Ala) 20%            |
| EGFR         | EXON 18   | c.2125G>A (p.Glu709Lys) 59%            |
| EGFR         | EXON 18   | c.2155G>T (p.Gly719Cys)                |
| EGFR         | EXON 18   | c.2156G>C (p.Gly719Ala)                |
| EGFR         | EXON 18   | c.2155G>T (p.Gly719Cys)                |
| EGFR         | EXON 18   | c.2156G>C (p.Gly719Ala) 5%             |
| EGFR         | EXON 18   | c.2156G>C (p.Gly719Ala) 19%            |
| EGFR         | EXON 18   | c.2156G>C (p.Gly719Ala) 33%            |
| EGFR         | EXON 18   | c.2164G>T (p.Ala722Ser) 16%            |
| EGFR         | EXON 18   | c.2155G>A (p.Gly719Ser)                |
| EGFR         | EXON 18   | c.2155G>T (p.Gly719Cys) 34%            |

|      |                  |                                                                      |
|------|------------------|----------------------------------------------------------------------|
| EGFR | EXON 18          | c.2126A>C (p.Glu709Ala) 35%                                          |
| EGFR | EXON 18          | c.2121G>T (p.Leu707Phe) (31%)                                        |
| EGFR | EXON 18          | c.2170G>A (p.Gly724Ser)                                              |
| EGFR | EXON 18          | c.2156G>C (p.Gly719Ala) 7%                                           |
| EGFR | EXON 18          | c.2155G>A (p.Gly719Ser) 92%                                          |
| EGFR | EXON 18          | c.2126A>C (p. Glu709Ala) 92%                                         |
| EGFR | EXON 18          | c.2155G>A (p.Gly719Ser) 11%                                          |
| EGFR | EXON 18          | c.2065G>A (p.Val689Met) 52%                                          |
| EGFR | EXON 18          | c.2155G>A (p.Gly719Ser) 22%                                          |
| EGFR | EXON 18          | c.2156G>C (p.Gly719Ala) 48%                                          |
| EGFR | EXON 18          | c.2126A>C (p.Glu709Ala) 48%                                          |
| EGFR | EXON 18          | c.2159C>T (p.Ser720Phe) 16%                                          |
| EGFR | EXON 18          | c.2156G>C (p.Gly719Ala) 94%                                          |
| EGFR | EXON 18          | c.2126A>C (p.Glu709Ala) 94%                                          |
| EGFR | EXON 18          | c.2152C>G (p.Leu718Val) (9%)                                         |
| EGFR | EXON 18          | c.2156G>C (p.Gly719Ala) 62%                                          |
| EGFR | EXON 19 DELETION | c.2235_2249delGGAATTAAGAGAAGC (p.Glu746_Ala750del) 76%               |
| EGFR | EXON 19 DELETION | c.2237_2255delAATTAAGAGAAGCAACATCinsT (p.Glu746_Ser752delinsVal) 16% |
| EGFR | EXON 19 DELETION | c.2235_2249delGGAATTAAGAGAAGC (p.Glu746_Ala750del) 35%               |
| EGFR | EXON 19 DELETION | c.2235_2249delGGAATTAAGAGAAGC (p.Glu746_Ala750del) 42%               |
| EGFR | EXON 19 DELETION | c.2235_2249delGGAATTAAGAGAAGC (p.Glu746_Ala750del) 66%               |
| EGFR | EXON 19 DELETION | c.2240_2257delTAAGAGAAGCAACATCTC (p.Leu747_Pro753delinsSer)          |
| EGFR | EXON 19 DELETION | c.2240_2257delTAAGAGAAGCAACATCTC (p.Leu747_Pro753delinsSer) 74%      |
| EGFR | EXON 19 DELETION | c.2236_2250delGAATTAAGAGAAGCA (p.Glu746_Ala750del) 19%               |
| EGFR | EXON 19 DELETION | c.2240_2257delTAAGAGAAGCAACATCTC (p.Leu747_Pro753delinsSer)          |
| EGFR | EXON 19 DELETION | c.2240_2254delTAAGAGAAGCAACAT (p.Leu747_Thr751del) 16%               |
| EGFR | EXON 19 DELETION | c.2236_2250delGAATTAAGAGAAGCA (p.Glu746_Ala750del) 15%               |
| EGFR | EXON 19 DELETION | (p.Glu746_Ala750del) 8%                                              |
| EGFR | EXON 19 DELETION | (p.Leu747_Pro753delinsSer) 14%                                       |
| EGFR | EXON 19 DELETION | c.2236_2250delGAATTAAGAGAAGCA (p.Glu746_Ala750del) 49%               |
| EGFR | EXON 19 DELETION | c.2235_2249delGGAATTAAGAGAAGC (p.Glu746_Ala750del) 21%               |
| EGFR | EXON 19 DELETION | (p.Glu746_Ala750del) 15%                                             |
| EGFR | EXON 19 DELETION | c.2239_2263delinsCCAACAT (p.Leu747_Ala755delinsProThrSer) 54%        |
| EGFR | EXON 19 DELETION | c.2235_2249delGGAATTAAGAGAAGC (p.Glu746_Ala750del)                   |
| EGFR | EXON 19 DELETION | c.2239_2248delTTAAGAGAAGinsC (p.Leu747_Ala750delinsPro) 7%           |
| EGFR | EXON 19 DELETION | c.2235_2249delGGAATTAAGAGAAGC (p.Glu746_Ala750del) 52%               |
| EGFR | EXON 19 DELETION | c.2235_2249delGGAATTAAGAGAAGC (p.Glu746_Ala750del) 55%               |
| EGFR | EXON 19 DELETION | c.2236_2250delGAATTAAGAGAAGCA (p.Glu746_Ala750del) 24%               |
| EGFR | EXON 19 DELETION | (p.Glu746_Ala750del) 21%                                             |
| EGFR | EXON 19 DELETION | (p.Glu746_Ala750del) 54%                                             |
| EGFR | EXON 19 DELETION | (p.Leu747_Ala750delinsPro) 21%                                       |
| EGFR | EXON 19 DELETION | c.2235_2249delGGAATTAAGAGAAGC (p.Glu746_Ala750del) 25%               |
| EGFR | EXON 19 DELETION | c.2235_2249delGGAATTAAGAGAAGC (p.Glu746_Ala750del) 24%               |
| EGFR | EXON 19 DELETION | (p.Glu746_Ala750del) 10%                                             |
| EGFR | EXON 19 DELETION | (p.Glu746_Ala750del) 30%                                             |
| EGFR | EXON 19 DELETION | c.2235_2249delGGAATTAAGAGAAGC (p.Glu746_Ala750del) 72%               |
| EGFR | EXON 19 DELETION | (p.Glu746_Ala750del) 23%                                             |

|      |                  |                                                                      |
|------|------------------|----------------------------------------------------------------------|
| EGFR | EXON 19 DELETION | c.2236_2250delGAATTAAGAGAAGCA (p.Glu746_Ala750del) 29%               |
| EGFR | EXON 19 DELETION | c.2235_2249delGGAATTAAGAGAAGC (p.Glu746_Ala750del) 61%               |
| EGFR | EXON 19 DELETION | c.2240_2254delTAAGAGAAGCAACAT (p.Leu747_Thr751del) 27%               |
| EGFR | EXON 19 DELETION | (p.Glu746_Ala750del) 65%                                             |
| EGFR | EXON 19 DELETION | (p.Leu747_Ala750delinsPro) 23%                                       |
| EGFR | EXON 19 DELETION | (p.Glu746_Ala750del) 30%                                             |
| EGFR | EXON 19 DELETION | (p.Glu746_Ala750del) 21%                                             |
| EGFR | EXON 19 DELETION | c.2235_2249delGGAATTAAGAGAAGC (p.Glu746Ala750del) 23%                |
| EGFR | EXON 19 DELETION | (p.Leu747_Thr751del) 75%                                             |
| EGFR | EXON 19 DELETION | (p.Glu746_Ala750del) 43%                                             |
| EGFR | EXON 19 DELETION | c.2237_2255delinsT (p.Glu746_Ser752delinsVal) 19%                    |
| EGFR | EXON 19 DELETION | c.2235_2249delGGAATTAAGAGAAGC (p.Glu746_Ala750del)                   |
| EGFR | EXON 19 DELETION | (p.Leu747_Ala750delinsPro) 24%                                       |
| EGFR | EXON 19 DELETION | c.2236_2250delGAATTAAGAGAAGCA (p.Glu746_Ala750del) 38%               |
| EGFR | EXON 19 DELETION | c.2237_2251delAATTAAGAGAAGCAA (p.Glu746_Thr751delinsAla) 54%         |
| EGFR | EXON 19 DELETION | c.2235_2249delGGAATTAAGAGAAGC (p.Glu746_Ala750del) 40%               |
| EGFR | EXON 19 DELETION | c.2235_2249delGGAATTAAGAGAAGC (p.Glu746_Ala750del)                   |
| EGFR | EXON 19 DELETION | c.2236_2250delGAATTAAGAGAAGCA (p.Glu746_Ala750del) 11%               |
| EGFR | EXON 19 DELETION | c.2235_2249delGGAATTAAGAGAAGC (p.Glu746_Ala750del) 8%                |
| EGFR | EXON 19 DELETION | c.2237_2255delAATTAAGAGAAGCAACATCinsT (p.Glu746_Ser752delinsVal) 37% |
| EGFR | EXON 19 DELETION | c.2236_2250delGAATTAAGAGAAGCA (p.Glu746_Ala750del) 28%               |
| EGFR | EXON 19 DELETION | c.2236_2250delGAATTAAGAGAAGCA (p.Glu746_Ala750del) 86%               |
| EGFR | EXON 19 DELETION | c.2236_2250delGAATTAAGAGAAGCA (p.Glu746_Ala750del) 11%               |
| EGFR | EXON 19 DELETION | c.2236_2250delGAATTAAGAGAAGCA (p.Glu746_Ala750del) 36%               |
| EGFR | EXON 19 DELETION | c.2236_2250delGAATTAAGAGAAGCA (p.Glu746_Ala750del) 14%               |
| EGFR | EXON 19 DELETION | c.2235_2249delGGAATTAAGAGAAGC (p.Glu746_Ala750del)                   |
| EGFR | EXON 19 DELETION | c.2236_2250delGAATTAAGAGAAGCA (p.Glu746_Ala750del) 20%               |
| EGFR | EXON 19 DELETION | c.2237_2255delAATTAAGAGAAGCAACATCinsT (p.Glu746_Ser752delinsVal)     |
| EGFR | EXON 19 DELETION | c.2235_2249delGGAATTAAGAGAAGC (p.Glu746_Ala750del) 76%               |
| EGFR | EXON 19 DELETION | c.2236_2250delGAATTAAGAGAAGCA (p.Glu746_Ala750del) 17%               |
| EGFR | EXON 19 DELETION | c.2235_2249delGGAATTAAGAGAAGC (p.Glu746_Ala750del) 19%               |
| EGFR | EXON 19 DELETION | c.2235_2249delGGAATTAAGAGAAGC (p.Glu746_Ala750del) 30%               |
| EGFR | EXON 19 DELETION | c.2236_2250delGAATTAAGAGAAGCA (p.Glu746_Ala750del) 32%               |
| EGFR | EXON 19 DELETION | c.2235_2249delGGAATTAAGAGAAGC (p.Glu746_Ala750del) 25%               |
| EGFR | EXON 19 DELETION | c.2240_2254delTAAGAGAAGCAACAT (p.Leu747_Thr751del) 81%               |
| EGFR | EXON 19 DELETION | c.2240_2254delTAAGAGAAGCAACAT (p.Leu747_Thr751del) 38%               |
| EGFR | EXON 19 DELETION | c.2237_2257del (p.Glu746_Pro753delinsAla) 18%                        |
| EGFR | EXON 19 DELETION | c.2236_2250delGAATTAAGAGAAGCA (p.Glu746_Ala750del) 34%               |
| EGFR | EXON 19 DELETION | c.2235_2249delGGAATTAAGAGAAGC (p.Glu746_Ala750del) 15%               |
| EGFR | EXON 19 DELETION | c.2235_2249delGGAATTAAGAGAAGC (p.Glu746_Ala750del) 92%               |
| EGFR | EXON 19 DELETION | c.2255C>G (p.Ser752Cys) 16%                                          |
| EGFR | EXON 19 DELETION | c.2235_2249delGGAATTAAGAGAAGC (p.Glu746_Ala750del) 48%               |
| EGFR | EXON 19 DELETION | c.2235_2249delGGAATTAAGAGAAGC (p.Glu746_Ala750del) 14%               |
| EGFR | EXON 19 DELETION | c.2236_2250delGAATTAAGAGAAGCA (p.Glu746_Ala750del) 55%               |
| EGFR | EXON 19 DELETION | c.2240_2257delTAAGAGAAGCAACATCTA (p.leu747Pro753delinsSer) 54%       |
| EGFR | EXON 19 DELETION | c.2237_2251delinsTTC(p.Glu746_Thr751delinsAla) 55%                   |
| EGFR | EXON 19 DELETION | c.2235_2249delGGAATTAAGAGAAGC (p.Glu746_Ala750del) 46%               |

|      |                  |                                                                       |
|------|------------------|-----------------------------------------------------------------------|
| EGFR | EXON 19 DELETION | c.2239_2248delTTAAGAGAAAGinsC (p.Leu747_Ala750delinsPro) 70%          |
| EGFR | EXON 19 DELETION | c.2237_2255delAATTAAGAGAAGCAACATCinsT (p.Glu746_Ser752delinsVal) 48%  |
| EGFR | EXON 19 DELETION | c.2237_2255delAATTAAGAGAAGCAACATCinsT (p.Glu746_Ser752delinsVal) 57%  |
| EGFR | EXON 19 DELETION | c.2236_2250delGAATTAAGAGAAGCA (p.Glu746_Ala750del) 38%                |
| EGFR | EXON 19 DELETION | c.2240_2254delTAAGAGAAGCAACAT (p.Leu747_Thr751del) 30%                |
| EGFR | EXON 19 DELETION | c.2240_2254delTAAGAGAAGCAACAT (p.Leu747_Thr751del) 76%                |
| EGFR | EXON 19 DELETION | c.2236_2250del (p.Glu746_Ala750del)                                   |
| EGFR | EXON 19 DELETION | c.2236_2250delGAATTAAGAGAAGCA (p.Glu746_Ala750del) 8%                 |
| EGFR | EXON 19 DELETION | c.2235_2249delGGAATTAAGAGAAGC (p.Glu746_Ala750del) 9%                 |
| EGFR | EXON 19 DELETION | c.2236_2250delGAATTAAGAGAAGCA (p.Glu746_Ala750del) 17%                |
| EGFR | EXON 19 DELETION | c.2239_2256delTTAAGAGAAGCAACATCT (p.Leu747_Ser752del)                 |
| EGFR | EXON 19 DELETION | c.2236_2250delGAATTAAGAGAAGCA (p.Glu746_Ala750del) 63%                |
| EGFR | EXON 19 DELETION | c.2235_2249delGGAATTAAGAGAAGC (p.Glu746_Ala750del) 23%                |
| EGFR | EXON 19 DELETION | c.2236_2250delGAATTAAGAGAAGCA (p.Glu746_Ala750del) 24%                |
| EGFR | EXON 19 DELETION | c.2236_2250delGAATTAAGAGAAGCA (p.Glu746_Ala750del) 32%                |
| EGFR | EXON 19 DELETION | c.2240_2257delTAAGAGAAGCAACATCTC (p.Leu747_Pro753delinsSer) 48%       |
| EGFR | EXON 19 DELETION | c.2235_2249delGGAATTAAGAGAAGC (p.Glu746_Ala750del) 44%                |
| EGFR | EXON 19 DELETION | c.2235_2249delGGAATTAAGAGAAGC (p.Glu746_Ala750del) 50%                |
| EGFR | EXON 19 DELETION | c.2236_2250delGAATTAAGAGAAGCA (p.Glu746_Ala750del) 16%                |
| EGFR | EXON 19 DELETION | c.2239_2248delTTAAGAGAAAGinsC (p.Leu747_Ala750delinsPro) 24%          |
| EGFR | EXON 19 DELETION | c.2235_2249delGGAATTAAGAGAAGC (p.Glu746_Ala750del) 47%                |
| EGFR | EXON 19 DELETION | c.2237_2255delAATTAAGAGAAGCAACATCinsT (p.Glu746_Ser752delinsVal) 16%  |
| EGFR | EXON 19 DELETION | c.2235_2240delinsAATTCC (p.Glu746_Leu747delinsIlePro) 32%             |
| EGFR | EXON 19 DELETION | c.2240_2254delTAAGAGAAGCAACAT (p.Leu747_Thr751del) 84%                |
| EGFR | EXON 19 DELETION | c.2235_2249delGGAATTAAGAGAAGC (p.Glu746_Ala750del)                    |
| EGFR | EXON 19 DELETION | Unknown                                                               |
| EGFR | EXON 19 DELETION | c.2239_2248delTTAAGAGAAAGinsC (p.Leu747_Ala750delinsPro) 70%          |
| EGFR | EXON 19 DELETION | c.2235_2249delGGAATTAAGAGAAGC (p.Glu746_Ala750del) 26%                |
| EGFR | EXON 19 DELETION | c.2235_2252delGGAATTAAGAGAAGCAACinsAAT (p.Glu746_Thr751delinsIle) 31% |
| EGFR | EXON 19 DELETION | c.2235_2249delGGAATTAAGAGAAGC (p.Glu746_Ala750del) 49%                |
| EGFR | EXON 19 DELETION | c.2235_2249delGGAATTAAGAGAAGC (p.Glu746_Ala750del)                    |
| EGFR | EXON 19 DELETION | c.2235_2249delGGAATTAAGAGAAGC (p.Glu746_Ala750del) 13%                |
| EGFR | EXON 19 DELETION | c.2240_2254delTAAGAGAAGCAACAT (p.Leu747_Thr751del) 54%                |
| EGFR | EXON 19 DELETION | c.2232_2249delinsAAA (p.Glu746_Ala750del) 10%                         |
| EGFR | EXON 19 DELETION | c.2235_2249delGGAATTAAGAGAAGC (p.Glu746_Ala750del) 18%                |
| EGFR | EXON 19 DELETION | c.2236_2250delGAATTAAGAGAAGCA (p.Glu746_Ala750del) 58%                |
| EGFR | EXON 19 DELETION | c.2236_2250delGAATTAAGAGAAGCA (p.Glu746_Ala750del) 49%                |
| EGFR | EXON 19 DELETION | c.2235_2249delGGAATTAAGAGAAGC (p.Glu746_Ala750del) 64%                |
| EGFR | EXON 19 DELETION | c.2235_2249delGGAATTAAGAGAAGC (p.Glu746_Ala750del) 90%                |
| EGFR | EXON 19 DELETION | c.2235_2249delGGAATTAAGAGAAGC (p.Glu746_Ala750del) 11%                |
| EGFR | EXON 19 DELETION | c.2235_2249delGGAATTAAGAGAAGC (p.Glu746_Ala750del) 38%                |
| EGFR | EXON 19 DELETION | c.2235_2249delGGAATTAAGAGAAGC (p.Glu746_Ala750del) 28%                |
| EGFR | EXON 19 DELETION | c.2236_2250delGAATTAAGAGAAGCA (p.Glu746_Ala750del) 17%                |
| EGFR | EXON 19 DELETION | c.2239_2248delTTAAGAGAAAGinsC (p.Leu747_Ala750delinsPro) 90%          |
| EGFR | EXON 19 DELETION | c.2236_2250delGAATTAAGAGAAGCA (p.Glu746_Ala750del) 41%                |
| EGFR | EXON 19 DELETION | c.2239_2256delTTAAGAGAAGCAACATCT (p.Leu747_Ser752del) 48%             |
| EGFR | EXON 19 DELETION | c.2235_2249delGGAATTAAGAGAAGC (p.Glu746_Ala750del) 20%                |

|      |                   |                                                                                  |
|------|-------------------|----------------------------------------------------------------------------------|
| EGFR | EXON 19 DELETION  | c.2235_2249delGGAATTAAGAGAAGC (p.Glu746_Ala750del) 28%                           |
| EGFR | EXON 19 DELETION  | c.2235_2249delGGAATTAAGAGAAGC (p.Glu746_Ala750del) 23%                           |
| EGFR | EXON 19 DELETION  | c.2235_2249delGGAATTAAGAGAAGC (p.Glu746_Ala750del) 34%                           |
| EGFR | EXON 19 DELETION  | c.2240_2257delTAAGAGAAGCAACATCTC (p.Leu747_Pro753delinsSer) 18%                  |
| EGFR | EXON 19 DELETION  | c.2235_2249delGGAATTAAGAGAAGC (p.Glu746_Ala750del) 40%                           |
| EGFR | EXON 19 DELETION  | c.2237_2255delAATTAAGAGAAGCAACATCinsT (p.Glu746_Ser752delinsVal) 27%             |
| EGFR | EXON 19 DELETION  | c.2237_2255delAATTAAGAGAAGCAACATCinsT (p.Glu746_Ser752delinsVal) 18%             |
| EGFR | EXON 19 DELETION  | c.2240_2257delTAAGAGAAGCAACATCTC (p.Leu747_Pro753delinsSer) 17%                  |
| EGFR | EXON 19 DELETION  | c.2235_2249delGGAATTAAGAGAAGC (p.Glu746_Ala750del) 56%                           |
| EGFR | EXON 19 DELETION  | c.2239_2264delinsGCAACATCTCCGGAAGG (p.Leu747_Ala755delinsAlaThrSerProGluGly) 58% |
| EGFR | EXON 19 DELETION  | c.2235_2249delGGAATTAAGAGAAGC (p.Glu746_Ala750del) 22%                           |
| EGFR | EXON 19 DELETION  | c.2239_2248delTTAAGAGAAGinsC (p.Leu747_Ala750delinsPro) 68%                      |
| EGFR | EXON 19 DELETION  | c.2235_2249delGGAATTAAGAGAAGC (p.Glu746_Ala750del) 25%                           |
| EGFR | EXON 19 DELETION  | c.2239_2248delTTAAGAGAAGinsC (p.Leu747_Ala750delinsPro) 11%                      |
| EGFR | EXON 19 DELETION  | c.2236_2250delGAATTAAGAGAAGCA (p.Glu746_Ala750del) 36%                           |
| EGFR | EXON 19 DELETION  | c.2235_2249delGGAATTAAGAGAAGC (p.Glu746_Ala750del) 2%                            |
| EGFR | EXON 19 DELETION  | c.2235_2249delGGAATTAAGAGAAGC (p.Glu746_Ala750del) 56%                           |
| EGFR | EXON 19 DELETION  | c.2235_2249delGGAATTAAGAGAAGC (p.Glu746_Ala750del) 31%                           |
| EGFR | EXON 19 DELETION  | c.2236_2250delGAATTAAGAGAAGCA (p.Glu746_Ala750del) 32%                           |
| EGFR | EXON 19 DELETION  | c.2235_2249delGGAATTAAGAGAAGC (p.Glu746_Ala750del) 10%                           |
| EGFR | EXON 19 DELETION  | c.2235_2249delGGAATTAAGAGAAGC (p.Glu746_Ala750del) 41%                           |
| EGFR | EXON 19 DELETION  | c.2237_2255delAATTAAGAGAAGCAACATCinsT (p.Glu746_Ser752delinsVal)                 |
| EGFR | EXON 19 DELETION  | c.2237_2255delAATTAAGAGAAGCAACATCinsT (p.Glu746_Ser752delinsVal)                 |
| EGFR | EXON 19 DELETION  | c.2235_2249delGGAATTAAGAGAAGC (p.Glu746_Ala750del) 44%                           |
| EGFR | EXON 19 DELETION  | c.2236_2250delGAATTAAGAGAAGCA (p.Cl746_Ala750del) 61%                            |
| EGFR | EXON 19 OTHER     | c.2281G>A (p.Asp761Asn)                                                          |
| EGFR | EXON 19 OTHER     | c.2239_2260delinsCAAC (p.Leu747_Lys754delinsGlnGln) 19%                          |
| EGFR | EXON 19 OTHER     | c.2240T>C (p.Leu747Ser)                                                          |
| EGFR | EXON 20 INSERTION | c.2314_2319dupCCCCAC (p.Pro772_His773dup) 32%                                    |
| EGFR | EXON 20 INSERTION | c.2308_2309insGGTTCGTGG (p.Val769_Asp770insGlyPheVal) 59%                        |
| EGFR | EXON 20 INSERTION | c.2311delinsCACCCC (p.Asn771delinsHisProHis) 26%                                 |
| EGFR | EXON 20 INSERTION | c.2312_2313insTGT (p.Asn771_Pro772insVal) (19%)                                  |
| EGFR | EXON 20 INSERTION | (p.Ala763_Tyr764insPheGlnGluAla) 45%                                             |
| EGFR | EXON 20 INSERTION | c.2311_2312insGGG (p.Asn771delinsArgAsp) (10%)                                   |
| EGFR | EXON 20 INSERTION | c.2300_2308dupCCAGCGTGG (p.Ala767_Val769dup) 13%                                 |
| EGFR | EXON 20 INSERTION | c.2319_2320insACCCAC (p.His773_Val774insThrHis) 34%                              |
| EGFR | EXON 20 INSERTION | c.2319_2320insACCCAC (p.His773_Val774insThrHis) 11%                              |
| EGFR | EXON 20 INSERTION | c.2311_2313delinsCACGTG (p.ASN771delinsHisVal)49%                                |
| EGFR | EXON 20 INSERTION | c.2303_2311dupGCGTGGACA (p.Ser768_Asp770dup) 42%                                 |
| EGFR | EXON 20 INSERTION | c.2303_2311dupGCGTGGACA (p. ser768_Asp770dup) 33%                                |
| EGFR | EXON 20 INSERTION | c.2319_2320insTAC (p.His773_Val774insTyr) 18%                                    |
| EGFR | EXON 20 INSERTION | c.2284-5_2290dup (p.Ala763_Tyr764insPheGlnGluAla) 26%                            |
| EGFR | EXON 20 INSERTION | c.2307_2315dupGGACAACCC (p.Asp770_Pro772dup) 23%                                 |
| EGFR | EXON 20 INSERTION | c.2316delinsTCACGTG (p.His773_Val774dup) 1%                                      |
| EGFR | EXON 20 INSERTION | c.2300_2308dupCCAGCGTGG (p.Ala767_Val769dup) 32%                                 |
| EGFR | EXON 20 INSERTION | c.2310_2311insGGG (p.Asp770_Asn771insGly) 30%                                    |
| EGFR | EXON 20 INSERTION | c.2308_2309insGCGAGG (p.Val769_Asp770insGlyGlu) 29%                              |

|      |               |                                                  |
|------|---------------|--------------------------------------------------|
| EGFR | EXON 20 OTHER | c.2300_2308dupCCAGCGTGG (p.Ala767_Val769dup) 28% |
| EGFR | EXON 20 OTHER | c.2303_2311dupGCGTGGACA (p.Ser768_Asp770dup) 51% |
| EGFR | EXON 20 OTHER | c.2389T>A (p.Cys797Gly) 6%                       |
| EGFR | EXON 20 OTHER | (p.Gly779Phe) 13%                                |
| EGFR | EXON 20 OTHER | c.2432C>T (p.Ser811Phe) 54%                      |
| EGFR | EXON 20 OTHER | c.2335_2336delGGinsTT (p.Gly779Phe) 26%          |
| EGFR | EXON 20 OTHER | c.2300_2308dupCCAGCGTGG (p.Ala767_Val769dup) 8%  |
| EGFR | EXON 20 OTHER | c.2303_2311dupGCGTGGACA (p.Ser768_Asp770dup) 22% |
| EGFR | EXON 20 OTHER | c.2303_2311dupGCGTGGACA (p.Ser768_Asp770dup) 15% |
| EGFR | EXON 20 OTHER | c.2300_2308dupCCAGCGTGG (p.Ala767_Val769dup) 13% |
| EGFR | EXON 20 OTHER | c.2300_2308dupCCAGCGTGG (p.Ala767_Val769dup) 16% |
| EGFR | EXON 20 OTHER | c.2303G>T (p.Ser768Ile) 33%                      |
| EGFR | EXON 20 OTHER | c.2300C>T (p.Ala767Val)                          |
| EGFR | EXON 20 OTHER | c.2317_2322dupCACGTG (p.His773_Val774dup) 29%    |
| EGFR | EXON 20 OTHER | c.2303G>T (p.Ser768Ile) 9%                       |
| EGFR | EXON 20 OTHER | c.2303G>T (p.Ser768Ile) 9%                       |
| EGFR | EXON 20 OTHER | c.2303_2311dupGCGTGGACA (p.Ser768_asp770dup) 37% |
| EGFR | EXON 21 OTHER | c.2612C>G (p.Ala871Gly)                          |
| EGFR | EXON 21 OTHER | c.2582T>A (p.Leu861Gln) 8%                       |
| EGFR | EXON 21 OTHER | c.2582T>A (p.Leu861Gln) 36%                      |
| EGFR | EXON 21 OTHER | c.2543C>T (p.Pro848Leu) 50%                      |
| EGFR | EXON 21 OTHER | c.2579A>T (p.Lys860Ile) 38%                      |
| EGFR | EXON 21 OTHER | c.2609A>G (p.His870Arg) 53%                      |
| EGFR | L858R         | c.2573T>G (p.Leu858Arg)                          |
| EGFR | L858R         | c.2573T>G (p.Leu858Arg) 7%                       |
| EGFR | L858R         | c.2573T>G (p.Leu858Arg)                          |
| EGFR | L858R         | c.2573T>G (p.Leu858Arg) 50%                      |
| EGFR | L858R         | c.2573GT>G (p.Leu858Arg) 31%                     |
| EGFR | L858R         | c.2573T>G (p.Leu858Arg) 27%                      |
| EGFR | L858R         | c.2573T>G (p.Leu858Arg)                          |
| EGFR | L858R         | c.2573T>G (p.Leu858Arg) 43%                      |
| EGFR | L858R         | c.2573T>G (p.Leu858Arg) 10%                      |
| EGFR | L858R         | c.2573T>G (p.Leu858Arg) 73%                      |
| EGFR | L858R         | c.2573T>G (p.Leu858Arg)                          |
| EGFR | L858R         | c.2573T>G (p.Leu858Arg)                          |
| EGFR | L858R         | c.2573T>G (p.Leu858Arg) 31%                      |
| EGFR | L858R         | c.2573T>G (p.Leu858Arg)                          |
| EGFR | L858R         | c.2573T>G (p.Leu858Arg) 13%                      |
| EGFR | L858R         | c.2573T>G (p.Leu858Arg)                          |
| EGFR | L858R         | c.2573T>G (p.Leu858Arg) 29%                      |
| EGFR | L858R         | c.2573T>G (p.Leu858Arg) 18%                      |
| EGFR | L858R         | c.2573T>G (p.Leu858Arg) (37%)                    |
| EGFR | L858R         | c.2573T>G (p.Leu858Arg) 30%                      |
| EGFR | L858R         | c.2573T>G (p.Leu858Arg) 34%                      |
| EGFR | L858R         | c.2573T>G (p.Leu858Arg) 15%                      |
| EGFR | L858R         | c.2573T>G (p.Leu858Arg) 62%                      |
| EGFR | L858R         | c.2573T>G (p.Leu858Arg) 19%                      |

|      |       |                                         |
|------|-------|-----------------------------------------|
| EGFR | L858R | c.2573GT>G (p.Leu858Arg) 11%            |
| EGFR | L858R | c.2573T>G (p.Leu858Arg) 10%             |
| EGFR | L858R | c.2573T>G (p.Leu858Arg) 21%             |
| EGFR | L858R | c.2573T>G (p.Leu858Met) 8%              |
| EGFR | L858R | c.2573T>G (p.Leu858Arg)                 |
| EGFR | L858R | c.2573T>G (p.Leu858Arg)                 |
| EGFR | L858R | c.2573T>G (p.Leu858Arg) 40%             |
| EGFR | L858R | c.2573T>G (p.Leu858Arg) 22%             |
| EGFR | L858R | c.2573T>G (p.Leu858Arg) 8%              |
| EGFR | L858R | c.2573_2574delinsGT (p.Leu858Arg) 22%   |
| EGFR | L858R | c.2573T>G (p.Leu858Arg) 54%             |
| EGFR | L858R | c.2573T>G (p.Leu858Arg) 36%             |
| EGFR | L858R | c.2573T>G (p.Leu858Arg) 34%             |
| EGFR | L858R | c.2573T>G (p.Leu858Arg) 26%             |
| EGFR | L858R | c.2573T>G (p.Leu858Arg)                 |
| EGFR | L858R | c.2573T>G (p.Leu858Arg) 30%             |
| EGFR | L858R | c.2563T>G (p.Leu858Arg) 10%             |
| EGFR | L858R | c.2573T>G (p.Leu858Arg) 20%             |
| EGFR | L858R | c.2573T>G (p.Leu858Arg) 14%             |
| EGFR | L858R | c.2573T>G (p.Leu858Arg) 12%             |
| EGFR | L858R | c.2573T>G (p.Leu858Arg) 41%             |
| EGFR | L858R | c.2573T>G (p.Leu858Arg) 18%             |
| EGFR | L858R | c.2573T>G (p.Leu858Arg) 31%             |
| EGFR | L858R | c.2573T>G (p.Leu858Arg) 24%             |
| EGFR | L858R | c.2573T>G (p.Leu858Arg) 23%             |
| EGFR | L858R | c.2573T>G (p.Leu858Arg) 12%             |
| EGFR | L858R | c.2573T>G (p.Leu858Arg) 20%             |
| EGFR | L858R | c.2573T>G (p.Leu858Arg) 14%             |
| EGFR | L858R | c.2573T>G (p.Leu858Arg) 67%             |
| EGFR | L858R | c.2573T>G (p.Leu858Arg) 93%             |
| EGFR | L858R | c.2573_2574delTGinsGT (p.Leu858Arg) 20% |
| EGFR | L858R | c.2573T>G (p.Leu858Arg) 27%             |
| EGFR | L858R | c.2573T>G (p.Leu858Arg) 71%             |
| EGFR | L858R | c.2573T>G (p.Leu858Arg) 10%             |
| EGFR | L858R | c.2573T>G (p.Leu858Arg) 47%             |
| EGFR | L858R | c.2572_2573delCTinsAG (p.Leu858Arg) 22% |
| EGFR | L858R | c.2573T>G (p.Leu858Arg) 31%             |
| EGFR | L858R | c.2573T>G (p.Leu858Arg) 7%              |
| EGFR | L858R | c.2573T>G (p.Leu858Arg) 10%             |
| EGFR | L858R | c.2573T>G (p.Leu858Arg) 35%             |
| EGFR | L858R | c.2573T>G (p.Leu858Arg) 9%              |
| EGFR | L858R | c.2573T>G (p.Leu858Arg) 66%             |
| EGFR | L858R | c.2573T>G (p.Leu858Arg) 27%             |
| EGFR | L858R | c.2573T>G (p.Leu858Arg)                 |
| EGFR | L858R | c.2573T>G (p.Leu858Arg) 73%             |
| EGFR | L858R | c.2573T>G (p.Leu858Arg) 59%             |
| EGFR | L858R | c.2573T>G (p.Leu858Arg) (30%)           |

|      |       |                             |
|------|-------|-----------------------------|
| EGFR | L858R | c.2573T>G (p.Leu858Arg) 70% |
| EGFR | L858R | c.2573T>G (p.Leu858Arg) 18% |
| EGFR | L858R | c.2573T>G (p.Leu858Arg) 81% |
| EGFR | L858R | c.2573T>G (p.Leu858Arg) 91% |
| EGFR | L858R | c.2573T>G (p.Leu858Arg)     |
| EGFR | L858R | c.2573T>G (p.Leu858Arg) 31% |
| EGFR | L858R | c.2573T>G (p.Leu858Arg) 24% |
| EGFR | L858R | c.2573T>G (p.Leu858Arg) 14% |
| EGFR | L858R | c.2573T>G (p.Leu858Arg) 30% |
| EGFR | L858R | c.2573T>G (p.Leu858Arg) 51% |
| EGFR | L858R | c.2573T>G (p.Leu858Arg) 23% |
| EGFR | L858R | c.2573T>G (p.Leu858Arg) 29% |
| EGFR | L858R | c.2573T>G (p.Leu858Arg) 22% |
| EGFR | L858R | c.2573T>G (p.Leu858Arg) 53% |
| EGFR | L858R | c.2573T>G (p.Leu858Arg) 28% |
| EGFR | L858R | c.2573T>G (p.Leu858Arg) 32% |
| EGFR | L858R | c.2573T>G (p.Leu858Arg) 16% |
| EGFR | L858R | c.2573T>G (p.Leu858Arg) 34% |
| EGFR | L858R | c.2573T>G (p.Leu858Arg) 18% |
| EGFR | L858R | c.2573T>G (p.Leu858Arg)     |
| EGFR | L858R | c.2573T>G (p.Leu858Arg)     |
| EGFR | L858R | c.2573T>G (p.Leu858Arg) 14% |
| EGFR | L858R | c.2573T>G (p.Leu858Arg) 21% |
| EGFR | L858R | c.2573T>G (p.Leu858Arg) 86% |
| EGFR | L858R | c.2573T>G (p.Leu858Arg) 11% |
| EGFR | L858R | c.2573T>G (p.Leu858Arg)     |
| EGFR | L858R | c.2573T>G (p.Leu858Arg) 14% |
| EGFR | L858R | c.2573T>G (p.Leu858Arg) 59% |
| EGFR | L858R | c.2573T>G (p.Leu858Arg) 18% |
| EGFR | L858R | c.2573T>G (p.Leu858Arg) 25% |
| EGFR | L858R | c.2573T>G (p.Leu858Arg) 4%  |
| EGFR | L858R | c.2573T>G (p.Leu858Arg) 27% |
| EGFR | L858R | c.2573T>G (p.Leu858Arg) 29% |
| EGFR | L858R | c.2573T>G (p.Leu858Arg) 59% |
| EGFR | L858R | c.2573T>G (p.Leu858Arg) 4%  |
| EGFR | L858R | c.2573T>G (p.Leu858Arg) 20% |
| EGFR | L858R | c.2573T>G (p.Leu858Arg) 91% |
| EGFR | L858R | c.2573T>G (p.Leu858Arg) 43% |
| EGFR | L858R | c.2573T>G (p.Leu858Arg) 15% |
| EGFR | L858R | c.2573T>G (p.Leu858Arg) 21% |
| EGFR | L858R | c.2573T>G (p.Leu858Arg) 38% |
| EGFR | L858R | c.2573T>G (p.Leu858Arg) 34% |
| EGFR | L858R | c.2573T>G (p.Leu858Arg) 38% |
| EGFR | L858R | c.2573T>G (p.Leu858Arg) 36% |
| EGFR | L858R | c.2573T>G (p.Leu858Arg) 35% |
| EGFR | L858R | c.2573T>G (p.Leu858Arg) 36% |
| EGFR | L858R | c.2573T>G (p.Leu858Arg) 83% |



|      |       |                                         |
|------|-------|-----------------------------------------|
| EGFR | L858R | c.2573T>G (p.Leu858Arg) 36%             |
| EGFR | L858R | c.2573T>G (p.Leu858Arg) 27%             |
| EGFR | L858R | c.2573T>G (p.Leu858Arg) 43%             |
| EGFR | L858R | c.2573T>G (p.Leu858Arg) 55%             |
| EGFR | L858R | c.2573T>G (p.Leu858Arg) 94%             |
| EGFR | L858R | c.2573T>G (p.Leu858Arg) 12%             |
| EGFR | L858R | c.2573T>G (p.Leu858Arg) 13%             |
| EGFR | L858R | c.2573T>G (p.Leu858Arg) 45%             |
| EGFR | L858R | c.2573T>G (p.Leu858Arg) 54%             |
| EGFR | L858R | c.2573T>G (p.Leu858Arg) 7%              |
| EGFR | L858R | c.2573T>G (p.Leu858Arg) (27%)           |
| EGFR | L858R | c.2573T>G (p.Leu858Arg) 26%             |
| EGFR | L858R | c.2573T>G (p.Leu858Arg) 26%             |
| EGFR | L858R | c.2573T>G (p.Leu858Arg) 24%             |
| EGFR | L858R | c.2573T>G (p.Leu858Arg) 35%             |
| EGFR | L858R | c.2573T>G (p.Leu858Arg) 15%             |
| EGFR | L858R | c.2573T>G (p.Leu858Arg) 24%             |
| EGFR | L858R | c.2573T>G (p.Leu858Arg) 32%             |
| EGFR | L858R | c.2573T>G (p.Leu858Arg) 31%             |
| EGFR | L858R | c.2573T>G (p.Leu858Arg) 53%             |
| EGFR | L858R | c.2573T>G (p.Leu858Arg) 47%             |
| EGFR | L858R | c.2573T>G (p.Leu858Arg) 64%             |
| EGFR | L858R | c.2573T>G (p.Leu858Arg) 13%             |
| EGFR | L858R | c.2572_2573delCTinsAG (p.Leu858Arg) 30% |
| EGFR | L858R | c.2573_2574delTGinsGT (p.Leu858Arg) 20% |
| EGFR | L858R | c.2573T>G (p.Leu858Arg) 13%             |
| EGFR | L861Q | c.2582T>A (p.Leu861Gln) 18%             |
| EGFR | L861Q | c.2582T>A (p.Leu861Gln)                 |
| EGFR | L861Q | c.2582T>A (p.Leu861Gln) 15%             |
| EGFR | L861Q | c.2582T>A (p.Leu861Gln) 83%             |
| EGFR | L861Q | c.2582T>A (p.Leu861Gln) 9%              |
| EGFR | L861Q | c.2582T>A (p.Leu861GLN) 10%             |
| EGFR | L861Q | c.2582T>A (p.Leu861Gln) 25%             |
| EGFR | L861Q | c.2582T>A (p.Leu861Gln) 22%             |
| EGFR | L861Q | c.2582T>A (p.Leu861Gln) (73%)           |
| EGFR | L861Q | c.2582T>A (p.Leu861Gln) 40%             |
| EGFR | OTHER | c.1451C>T (p.Ser484Phe) 50%             |
| EGFR | T790M | c.2369C>T (p.Thr790Met) 50%             |
| EGFR | T790M | c.2369C>T (p.Thr790Met) 26%             |
| EGFR | T790M | c.2369C>T (p.Thr790Met) 1%              |
| EGFR | T790M | c.2369C>T (p.Thr790Met) 27%             |
| EGFR | T790M | c.2369C>T (p.Thr790Met) 9%              |
| EGFR | T790M | c.2369C>T (p.Thr790Met) 15%             |
| EGFR | T790M | c.2369C>T (p.Thr790Met) 31%             |
| EGFR | T790M | c.2369C>T (p.Thr790Met) 25%             |
| EGFR | T790M | c.2369C>T (p.Thr790Met) 34%             |
| EGFR | T790M | c.2369C>T (p.Thr790Met) 6%              |

|       |         |                                                                  |
|-------|---------|------------------------------------------------------------------|
| EGFR  | T790M   | c.2369C>T (p.Thr790Met) 29%                                      |
| EGFR  | T790M   | c.2369C>T (p.Thr790Met) 63%                                      |
| EGFR  | T790M   | c.2369C>T (p.Trh790Met) 12%                                      |
| EGFR  | T790M   | c.2369C>T (p.Thr790Met) 14%                                      |
| EGFR  | T790M   | c.2369C>T (p.Thr790Met) 6%                                       |
| EGFR  | T790M   | c.2369C>T (p.Thr790Met) 2%                                       |
| ERBB2 | EXON 20 | c.2313_2324dupATACGTGATGGC (p. Tyr772_Ala775dup) 16%             |
| ERBB2 | EXON 20 | c.2313_2324dupATACGTGATGGC (p.Tyr772_Ala775dup) 34%              |
| ERBB2 | EXON 20 | c.2326_2327insTGT (p.Gly776delinsValCys) 15%                     |
| ERBB2 | EXON 20 | Unknown                                                          |
| ERBB2 | EXON 20 | c.2313_2324dupATACGTGATGGC (p.Tyr772_Ala775dup) 97%              |
| ERBB2 | EXON 20 | c.2314_2325dupTACGTGATGGCT (p.Tyr772_Ala775dup) 26%              |
| ERBB2 | EXON 20 | Unknown                                                          |
| ERBB2 | EXON 20 | c.2313_2324dupATACGTGATGGC (p.Tyr772_Ala775dup) 15%              |
| ERBB2 | EXON 20 | c.2313_2324dupATACGTGATGGC (p.Tyr772_Ala775dup) 13%              |
| ERBB2 | EXON 20 | c.2313_2324dupATACGTGATGGC (p.Tyr772_Ala775dup) 41%              |
| ERBB2 | EXON 20 | Unknown                                                          |
| ERBB2 | EXON 20 | c.2313_2324dupATACGTGATGGC (p.Tyr772_Ala775dup) 63%              |
| ERBB2 | EXON 20 | c.2313_2324dupATACGTGATGGC (p.Tyr772_Ala775dup)                  |
| ERBB2 | EXON 20 | Unknown                                                          |
| ERBB2 | EXON 20 | Unknown                                                          |
| ERBB2 | EXON 20 | c.2313_2324dupATACGTGATGGC (p.Tyr772_Ala775dup) 48%              |
| ERBB2 | EXON 20 | c.2313_2324dupATACGTGATGGC (p.Tyr772_Ala775dup)                  |
| ERBB2 | EXON 20 | c.2313_2324dupATACGTGATGGC (p.Tyr772_Ala775dup) 63%              |
| ERBB2 | EXON 20 | c.2313_2324dupATACGTGATGGC (p.Tyr772_Ala775dup) 55%              |
| ERBB2 | EXON 20 | c.2313_2324dupATACGTGATGGC (p.Tyr772_Ala775dup) 28%              |
| ERBB2 | EXON 20 | c.2313_2324dup(ATACGTGATGGC (p.Tyr772_Ala775dup) 40%             |
| ERBB2 | EXON 20 | c.2326_2331delinsAGTGTGTGT (p.Gly776_Val777delinsServValCys) 32% |
| ERBB2 | EXON 20 | c.2331_2339dupGGGCTCCCC (p.Gly778_Pro780dup) 32%                 |
| ERBB2 | OTHER   | c.2521C>A (p.Leu841Ile) 9%                                       |
| ERBB2 | OTHER   | c.2264T>C (p.Leu755Ser) 23%                                      |
| ERBB2 | OTHER   | c.2263_2264delTTinsGC (p.Leu755Ala)                              |
| ERBB2 | OTHER   | c.2263_2265delTTGinsCCC (p.Leu755Pro) 46%                        |
| ERBB2 | TMD     | c.1976T>A (p.Val659Asp)                                          |
| ERBB2 | TMD     | c.1976_1977delTTinsAA (p.Val659Glu) 32%                          |
| ERBB2 | TMD     | c.1979G>A (p.Gly660Asp)                                          |
| ERBB2 | TMD     | c.1976_1977delTTinsAA (p.Val659Glu)                              |
| KRAS  | G12A    | c.35G>C (p.Gly12Ala)                                             |
| KRAS  | G12A    | c.35G>C (p.Gly12Ala) 37%                                         |
| KRAS  | G12A    | c.35G>C (p.Gly12Ala) 26%                                         |
| KRAS  | G12A    | c.35G>C (p.Gly12Ala) 8%                                          |
| KRAS  | G12A    | c.35G>C (p.Gly12Ala) 24%                                         |
| KRAS  | G12A    | c.35G>C (p.Gly12Ala) 17%                                         |
| KRAS  | G12A    | c.35G>C (p.Gly12Ala) 7%                                          |
| KRAS  | G12A    | c.35G>C (p.Gly12Ala) 24%                                         |
| KRAS  | G12A    | c.35G>C (p.Gly12Ala) 22%                                         |
| KRAS  | G12A    | c.35G>C (p.Gly12Ala) 32%                                         |

|      |      |                          |
|------|------|--------------------------|
| KRAS | G12A | c.35G>C (p.Gly12Ala) 13% |
| KRAS | G12A | c.35G>C (p.Gly12Ala) 9%  |
| KRAS | G12A | c.35G>C (p.Gly12Ala) 15% |
| KRAS | G12A | c.35G>C (p.Gly12Ala) 17% |
| KRAS | G12A | c.35G>C (p.Gly12Ala) 37% |
| KRAS | G12A | c.35G>C (p.Gly12Ala)     |
| KRAS | G12A | c.35G>C (p.Gly12Ala)     |
| KRAS | G12A | c.35G>C (p.Gly12Ala) 16% |
| KRAS | G12A | c.35G>C (p.Gly12Ala) 10% |
| KRAS | G12A | c.35G>C (p.Gly12Ala) 50% |
| KRAS | G12A | c.35G>C (p.Gly12Ala) 12% |
| KRAS | G12A | c.35G>C (p.Gly12Ala) 71% |
| KRAS | G12A | c.35G>C (p.Gly12Ala) 29% |
| KRAS | G12A | c.35G>C (p.Gly12Ala) 10% |
| KRAS | G12A | c.35G>C (p.Gly12Ala) 22% |
| KRAS | G12A | c.35G>C (p. Gly12Ala) 5% |
| KRAS | G12A | c.35G>C (p.Gly12Ala) 7%  |
| KRAS | G12A | c.35G>C (p.Gly12Ala) 3%  |
| KRAS | G12A | c.35G>C (p.Gly12Ala) 7%  |
| KRAS | G12A | c.35G>C (p.Gly12Ala) 31% |
| KRAS | G12A | c.35G>C (p.Gly12Ala) 23% |
| KRAS | G12A | c.35G>C (p.Gly12Ala) 16% |
| KRAS | G12A | c.35G>C (p.Gly12Ala) 71% |
| KRAS | G12A | c.35G>C (p.Gly12Ala)     |
| KRAS | G12A | c.35G>C (p.Gly12Ala)     |
| KRAS | G12A | c.35G>C (p.Gly12Ala) 29% |
| KRAS | G12A | c.35G>C (p.Gly12Ala) 63% |
| KRAS | G12A | c.35G>C (p.Gly12Ala) 6%  |
| KRAS | G12A | c.35G>C (p.Gly12Ala) 41% |
| KRAS | G12A | c.35 G>C (p.Gly12Ala) 8% |
| KRAS | G12A | c.35G>C (p.Gly12Ala) 12% |
| KRAS | G12A | c.35G>C (p.Gly12Ala) 39% |
| KRAS | G12C | c.34G>T (p.Gly12Cys) 24% |
| KRAS | G12C | c.34G>T (p.Gly12Cys) 14% |
| KRAS | G12C | c.34G>T (p.Gly12Cys) 21% |
| KRAS | G12C | c.34G>T (p.Gly12Cys) 24% |
| KRAS | G12C | c.34G>T (p.Gly12Cys) 20% |
| KRAS | G12C | c.34G>T (p.Gly12Cys) 12% |
| KRAS | G12C | c.34G>T (p.Gly12Cys)     |
| KRAS | G12C | c.34G>T (p.Gly12Cys) 40% |
| KRAS | G12C | c.34G>T (p.Gly12Cys) 37% |
| KRAS | G12C | c.34G>T (p.Gly12Cys) 15% |
| KRAS | G12C | c.34G>T (p.Gly12Cys)     |
| KRAS | G12C | c.34G>T (p.Gly12Cys)     |
| KRAS | G12C | c.34G>T (p.Gly12Cys) 21% |
| KRAS | G12C | c.34G>T (p.Gly12Cys) 20% |
| KRAS | G12C | c.34G>T (p.Gly12Cys) 7%  |

|      |      |                           |
|------|------|---------------------------|
| KRAS | G12C | c.34G>T (p.Gly12Cys)      |
| KRAS | G12C | c.34G>T (p.Gly12Cys)      |
| KRAS | G12C | c.34G>T (p.Gly12Cys)      |
| KRAS | G12C | c.34G>T (p.Gly12Cys) 9%   |
| KRAS | G12C | c.34G>T (p.Gly12Cys) 8%   |
| KRAS | G12C | c.34G>T (p.Gly12Cys) 31%  |
| KRAS | G12C | c.34G>T (p.Gly12Cys) 23%  |
| KRAS | G12C | c.34G>T (p.Gly12Cys)      |
| KRAS | G12C | c.34G>T (p.Gly12Cys) 26%  |
| KRAS | G12C | c.34G>T (p.Gly12Cys) 16%  |
| KRAS | G12C | c.34G>T (p.Gly12Cys) 33%  |
| KRAS | G12C | c.34G>T (p.Gly12Cys) 11%  |
| KRAS | G12C | c.34G>T (p.Gly12Cys) 26%  |
| KRAS | G12C | c.34G>T (p.Gly12Cys) 33%  |
| KRAS | G12C | c.34G>T (p.Gly12Cys) 16%  |
| KRAS | G12C | c.34G>T (p. Gly12Cys) 72% |
| KRAS | G12C | c.34G>T (p.Gly12Cys) 53%  |
| KRAS | G12C | c.34G>T (p.Gly12Cys) 73%  |
| KRAS | G12C | c.34G>T (p.Gly12Cys) 78%  |
| KRAS | G12C | c.34G>T (p.Gly12Cys) 11%  |
| KRAS | G12C | c.34G>T (p.Gly12Cys) 32%  |
| KRAS | G12C | c.34G>T (p.Gly12Cys) 11%  |
| KRAS | G12C | c.34G>T (p.Gly12Cys)      |
| KRAS | G12C | c.34G>T (p.Gly12Cys) 50%  |
| KRAS | G12C | c.34G>T (p.Gly12Cys)      |
| KRAS | G12C | c.34G>T (p.Gly12Cys) 17%  |
| KRAS | G12C | c.34G>T (p.Gly12Cys) 30%  |
| KRAS | G12C | c.34G>T (p. Gly12Cys) 27% |
| KRAS | G12C | c.34G>T (p.Gly12Cys) 61%  |
| KRAS | G12C | c.34G>T (p.Gly12Cys)      |
| KRAS | G12C | c.34G>T (p.Gly12Cys) 12%  |
| KRAS | G12C | c.34G>T (p.Gly12Cys) 10%  |
| KRAS | G12C | c.34G>T (p.Gly12Cys) 87%  |
| KRAS | G12C | c.34G>T (p.Gly12Cys) 14%  |
| KRAS | G12C | c.34G>T (p.Gly12Cys) 19%  |
| KRAS | G12C | c.34G>T (p.Gly12Cys) 18%  |
| KRAS | G12C | c.34G>T (p.Gly12Cys) 30%  |
| KRAS | G12C | c.34G>T (p.Gly12Cys) 5%   |
| KRAS | G12C | c.34G>T (p.Gly12Cys) 17%  |
| KRAS | G12C | c.34G>T (p.Gly12Cys) 17%  |
| KRAS | G12C | c.34G>T (p.Gly12Cys) 35%  |
| KRAS | G12C | c.34G>T (p.Gly12Cys) 11%  |
| KRAS | G12C | c.34G>T (p.Gly12Cys) 14%  |
| KRAS | G12C | c.36G>T (p.Gly12Cys) 76%  |
| KRAS | G12C | c.34G>T (p. Gly12Cys) 18% |
| KRAS | G12C | c.34G>T (p.Gly12Cys) 22%  |
| KRAS | G12C | c.34G>T (p.Gly12Cys) 8%   |

|      |      |                           |
|------|------|---------------------------|
| KRAS | G12C | c.34G>T (p.Gly12Cys) 54%  |
| KRAS | G12C | c.34G>T (p.Gly12Cys) 4%   |
| KRAS | G12C | c.34G>T (p.Gly12Cys) 24%  |
| KRAS | G12C | c.34G>T (p.Gly12Cys) 13%  |
| KRAS | G12C | c.34G>T (p.Gly12Cys) 38%  |
| KRAS | G12C | c.34G>T (p.Gly12Cys) 37%  |
| KRAS | G12C | c.34G>T (p. Gly12Cys) 14% |
| KRAS | G12C | c.34G>T (p.Gly12Cys) 25%  |
| KRAS | G12C | c.34G>T (p.Gly12Cys) 20%  |
| KRAS | G12C | c.34G>T (p.Gly12Cys) 18%  |
| KRAS | G12C | c.34G>T (p.Gly12Cys) 5%   |
| KRAS | G12C | c.34G>T (p.Gly12Cys) 27%  |
| KRAS | G12C | c.34G>T (p.Gly12Cys) 28%  |
| KRAS | G12C | c.34G>T (p.Gly12Cys) 17%  |
| KRAS | G12C | c.34G>T (p.Gly12Cys) 5%   |
| KRAS | G12C | c.34G>T (p.Gly12Cys) 67%  |
| KRAS | G12C | c.34G>T (p.Gly12Cys) 17%  |
| KRAS | G12C | c.34G>T (p. Gly12Cys) 9%  |
| KRAS | G12C | c34G>T (p.Gly12Cys) 31%   |
| KRAS | G12C | c.34G>T (p. Gly12Cys) 15% |
| KRAS | G12C | c.34G>T (p.Gly12Cys) 43%  |
| KRAS | G12C | c.34G>T (p.Gly12Cys) 15%  |
| KRAS | G12C | c.34G>T (p.Gly12Cys) 55%  |
| KRAS | G12C | c.34G>T (p.Gly12Cys) 25%  |
| KRAS | G12C | c.34G>T (p. Gly12Cys) 18% |
| KRAS | G12C | c.34G>T (p.Gly12Cys)      |
| KRAS | G12C | c.34G>T (p. Gly12Cys) 23% |
| KRAS | G12C | c.34G>T (p.Gly12Cys) 16%  |
| KRAS | G12C | c.34G>T (p. Gly12Cys) 20% |
| KRAS | G12C | c.34G>T (pGly12Cys) 10%   |
| KRAS | G12C | c.34G>T (p.Gly12Cys)      |
| KRAS | G12C | c.34G>T (p.Gly12Cys) 39%  |
| KRAS | G12C | c.34G>T (p.Gly12Cys) 6%   |
| KRAS | G12C | c.34G>T (p.Gly12Cys) 8%   |
| KRAS | G12C | c.34G>T (p.Gly12Cys)      |
| KRAS | G12C | c.34G>T (p. Gly12Cys) 57% |
| KRAS | G12C | c.34G>T (p.Gly12Cys) 26%  |
| KRAS | G12C | c.34G>T (p.Gly12Cys) 51%  |
| KRAS | G12C | c.34G>T (p.Gly12Cys) 30%  |
| KRAS | G12C | c.34G>T (p.Gly12Cys) 36%  |
| KRAS | G12C | c.34G>T (p.Gly12Cys) 59%  |
| KRAS | G12C | c.34G>T (p.Gly12Cys) 19%  |
| KRAS | G12C | c.34G>T (p.Gly12Cys) 39%  |
| KRAS | G12C | c.34G>T (p.Gly12Cys) 70%  |
| KRAS | G12C | c.34G>T (p.Gly12Cys) 29%  |
| KRAS | G12C | c.34G>T (p.Gly12Cys) 24%  |
| KRAS | G12C | c.34G>T (p.Gly12Cys) 91%  |

|      |      |                           |
|------|------|---------------------------|
| KRAS | G12C | c.34G>T (p.Gly12Cys) 22%  |
| KRAS | G12C | c.34G>T (p.Gly12Cys) 19%  |
| KRAS | G12C | c.34G>T (p.Gly12Cys) 21%  |
| KRAS | G12C | c.34G>T (p.Gly12Cys) 21%  |
| KRAS | G12C | c.34G>T (p.Gly12Cys) 34%  |
| KRAS | G12C | c.34G>T (p.Gly12Cys) 75%  |
| KRAS | G12C | c.34G>T (p.Gly12Cys) 59%  |
| KRAS | G12C | c.34G>T (p.Gly12Cys) 61%  |
| KRAS | G12C | c.34G>T (p.Gly12Cys) 7%   |
| KRAS | G12C | c.34G>T (p.Gly12Cys) 56%  |
| KRAS | G12C | c.34G>T (p.Gly12Cys)      |
| KRAS | G12C | c.34G>T (p.Gly12Cys) 45%  |
| KRAS | G12C | c.34G>T (p.Gly12Cys) 27%  |
| KRAS | G12C | c.34G>T (p.Gly12Cys) 27%  |
| KRAS | G12C | c.34G>T (p.Gly12Cys) 30%  |
| KRAS | G12C | c.34G>T (p.Gly12Cys) 41%  |
| KRAS | G12C | c.34G>T (p.Gly12Cys)      |
| KRAS | G12C | c.34G>T (p.Gly12Cys)      |
| KRAS | G12C | c.34G>T (p.Gly12Cys) 21%  |
| KRAS | G12C | c.34G>T (p.Gly12Cys) 55%  |
| KRAS | G12C | c.34G>T (p.Gly12Cys)      |
| KRAS | G12C | c.34G>T (p.Gly12Cys)      |
| KRAS | G12C | c.34G>T (p.Gly12Cys) 28%  |
| KRAS | G12C | c.34G>T (p. Gly12Cys) 66% |
| KRAS | G12C | c.34G>T (p.Gly12Cys) 28%  |
| KRAS | G12C | c.34G>T (p.Gly12Cys)      |
| KRAS | G12C | c.34G>T (p.Gly12Cys) 61%  |
| KRAS | G12C | c.34G>T (p.Gly12Cys) 9%   |
| KRAS | G12C | c.34G>T (p.Gly12Cys) 9%   |
| KRAS | G12C | c.34G>T (p.Gly12Cys) 16%  |
| KRAS | G12C | c.34G>T (p.Gly12Cys) 17%  |
| KRAS | G12C | c.34G>T (p.Gly12Cys) 45%  |
| KRAS | G12C | c.34G>T (p.Gly12Cys) 18%  |
| KRAS | G12C | c.34G>T (p.Gly12Cys) 27%  |
| KRAS | G12C | c.34G>T (p.Gly12Cys) 13%  |
| KRAS | G12C | c.34G>T (p.Gly12Cys) 25%  |
| KRAS | G12C | c.34G>T (p.Gly12Cys) 52%  |
| KRAS | G12C | c.34G>T (p.Gly12Cys) 25%  |
| KRAS | G12C | c.34G>T (p.Gly12Cys) 29%  |
| KRAS | G12C | c.34G>T (p.Gly12Cys) 28%  |
| KRAS | G12C | c.34G>T (p.Gly12Cys) 42%  |
| KRAS | G12C | c.34G>T (p.Gly12Cys) 44%  |
| KRAS | G12C | c.34G>T (p.Gly12Cys) 14%  |
| KRAS | G12C | c.34G>T (p.Gly12Cys) 46%  |
| KRAS | G12C | c.34G>T (p.Gly12Cys) 22%  |
| KRAS | G12C | c.34G>T (p.Gly12Cys) 57%  |
| KRAS | G12C | c.34G>T (p.Gly12Cys) 33%  |

|      |      |                           |
|------|------|---------------------------|
| KRAS | G12C | c.34G>T (p.Gly12Cys) 19%  |
| KRAS | G12C | c.34G>T (p.Gly12Cys) 10%  |
| KRAS | G12C | c.34G>T (p.Gly12Cys) 5%   |
| KRAS | G12C | c.34G>T (p.Gly12Cys) 13%  |
| KRAS | G12C | c.34G>T (p.Gly12Cys) 52%  |
| KRAS | G12C | c.34G>T (p.Gly12Cys) 11%  |
| KRAS | G12C | c.34G>T (p.Gly12Cys) 34%  |
| KRAS | G12C | c.34G>T (p. Gly12Cys) 31% |
| KRAS | G12C | c.34G>T (p.Gly12Cys) 12%  |
| KRAS | G12D | c.35G>A (p.Gly12Asp)      |
| KRAS | G12D | c.35G>A (p.Gly12Asp)      |
| KRAS | G12D | c.35G>A (p.Gly12Asp)      |
| KRAS | G12D | c.35G>A (p.Gly12Asp) 43%  |
| KRAS | G12D | c.35G>A (p.Gly12Asp) 51%  |
| KRAS | G12D | c.35G>A (p.Gly12Asp)      |
| KRAS | G12D | c.35G>A (p.Gly12Asp) 26%  |
| KRAS | G12D | c.35G>A (p.Gly12Asp)      |
| KRAS | G12D | c.35G>A (p.Gly12Asp) 26%  |
| KRAS | G12D | c.35G>A (p.Gly12Asp) 11%  |
| KRAS | G12D | c.35G>A (p.Gly12Asp) 8%   |
| KRAS | G12D | c.35G>A (p.Gly12Asp)      |
| KRAS | G12D | c.35G>A (p.Gly12Asp) 43%  |
| KRAS | G12D | c.35G>A (p.Gly12Asp) 60%  |
| KRAS | G12D | c.35G>A (p.Gly12Asp) 36%  |
| KRAS | G12D | c.35G>A (p.Gly12Asp) 21%  |
| KRAS | G12D | c.35G>A (p.Gly12Asp) 30%  |
| KRAS | G12D | c.35G>A (p.Gly12Asp) 25%  |
| KRAS | G12D | c.35G>A (p.Gly12Asp) 27%  |
| KRAS | G12D | c.35G>A (p.Gly12Asp) 68%  |
| KRAS | G12D | c.35G>A (p.Gly12Asp) 18%  |
| KRAS | G12D | c.35G>A (p.Gly12Asp) 23%  |
| KRAS | G12D | c.35G>A (p.Gly12Asp) 18%  |
| KRAS | G12D | c.35G>A (p.Gly12Asp)      |
| KRAS | G12D | c.35G>A (p.Gly12Asp) 57%  |
| KRAS | G12D | c.35G>A (p.Gly12Asp)      |
| KRAS | G12D | c.35G>A (p. Gly12Asp) 21% |
| KRAS | G12D | c.35G>A (p.Gly12Asp) 64%  |
| KRAS | G12D | c.35G>A (p.Gly12Asp) 41%  |
| KRAS | G12D | c.35G>A (p.Gly12Asp) 23%  |
| KRAS | G12D | c.35G>A (p.Gly12Asp) 12%  |
| KRAS | G12D | c.35G>A (p.Gly12Asp) 10%  |
| KRAS | G12D | c.35G>A (p.Gly12Asp) 29%  |
| KRAS | G12D | c.35G>A (p.Gly12Asp)      |
| KRAS | G12D | c.35G>A (p.Gly12Asp) 30%  |
| KRAS | G12D | c.35G>A (p.Gly12Asp) 16%  |
| KRAS | G12D | c.35G>A (p. Gly12Asp) 29% |
| KRAS | G12D | c.35G>A (p.Gly12Asp)      |

|      |      |                                    |
|------|------|------------------------------------|
| KRAS | G12D | c.35G>A (p.Gly12Asp) 24%           |
| KRAS | G12D | c.35G>A (p.Gly12Asp) 72%           |
| KRAS | G12D | c.35G>A (p.Gly12Asp) 13%           |
| KRAS | G12D | c.35G>A (p.Gly12Asp)               |
| KRAS | G12D | c.35G>A (p.Gly12Asp) 40%           |
| KRAS | G12D | c.35G>A (p. Gly12Asp) 18%          |
| KRAS | G12D | c.35G>A (p.Gly12Asp)               |
| KRAS | G12D | c.35G>A (p.Gly12Asp) 12%           |
| KRAS | G12D | c.35G>A (p.Gly12Asp) 3%            |
| KRAS | G12D | c.35G>A (p.Gly12Asp) 13%           |
| KRAS | G12D | c.35G>A (p.Gly12Asp)               |
| KRAS | G12D | c.35G>A (p.Gly12Asp) 38%           |
| KRAS | G12D | c.35G>A (p.Gly12Asp) 24%           |
| KRAS | G12D | c.36G>A (p.Gly12Asp) 29%           |
| KRAS | G12D | c.35G>A (p.Gly12Asp) 14%           |
| KRAS | G12D | c.35G>A (p.Gly12Asp) 11%           |
| KRAS | G12D | c.35G>A (p.Gly12Asp) 73%           |
| KRAS | G12D | c.35G>A (p.Gly12Asp) 20%           |
| KRAS | G12D | c.35G>A (p.Gly12Asp) 13%           |
| KRAS | G12D | c.35G>A (p.Gly12Asp) 63%           |
| KRAS | G12D | c.35G>A (p.Gly12Asp) 18%           |
| KRAS | G12D | c.35G>A (p.Gly12Asp) 3%            |
| KRAS | G12D | c.35G>A (p.Gly12Asp) 72%           |
| KRAS | G12D | c.35G>A (p.Gly12Asp)               |
| KRAS | G12D | c.35G>A (p.Gly12Asp) 23%           |
| KRAS | G12D | c.35G>A (p.Gly12Asp)               |
| KRAS | G12D | c.35G>A (p.Gly12Asp)               |
| KRAS | G12D | c.35G>A (p.Gly12Asp) 8%            |
| KRAS | G12D | c.35G>A (p.Gly12Asp)               |
| KRAS | G12D | c.35G>A (p.Gly12Asp) 35%           |
| KRAS | G12D | c.35G>A (p.Gly12Asp) 25%           |
| KRAS | G12D | c.35G>A (p.Gly12Asp) 15%           |
| KRAS | G12D | c.35G>A (p.Gly12Asp) 15%           |
| KRAS | G12D | c.35G>A (p.Gly12Asp) 25%           |
| KRAS | G12D | c.35G>A (p.Gly12Asp) 26%           |
| KRAS | G12D | c.35G>A (p.Gly12Asp) 18%           |
| KRAS | G12D | c.35G>A (p.Gly12Asp) 58%           |
| KRAS | G12D | c.35G>A (p.Gly12Asp) 22%           |
| KRAS | G12D | c.35G>A (p.Gly12Asp) 30%           |
| KRAS | G12D | c.35G>A (p.Gly12Asp) 24%           |
| KRAS | G12D | c.35G>A (p.Gly12Asp) 21%           |
| KRAS | G12D | c.35G>A (p.Gly12Asp) 35%           |
| KRAS | G12D | c.35G>A (p.Gly12Asp) 8%            |
| KRAS | G12D | c.35G>A (p.Gly12Asp)               |
| KRAS | G12D | c.35G>A (p.Gly12Asp) 49%           |
| KRAS | G12D | c.35G>A (p.Gly12Asp)               |
| KRAS | G12F | c.34_35delGGinsTT (p.Gly12Phe) 12% |



|      |      |                                      |
|------|------|--------------------------------------|
| KRAS | G12F | c.34_35delGGinsTT (p.Gly12Phe) 39%   |
| KRAS | G12F | c.34_35delGGinsTT (p.Gly12Phe) 9%    |
| KRAS | G12F | c.34_35delinsTT (p. Gly12Phe) 41%    |
| KRAS | G12F | c.34_35delGGinsTT (p.Gly12Phe) 9%    |
| KRAS | G12F | c.34_35delGGinsTT (p.Gly12Phe) 42%   |
| KRAS | G12F | c.34_35delGGinsTT (p.Gly12Phe) 13%   |
| KRAS | G12F | c.34_35delGGinsTT (p.Gly12Phe) 51%   |
| KRAS | G12F | c.34_35delGGinsTT (p.Gly12Phe) 29%   |
| KRAS | G12R | c.34G>C (p.Gly12Arg) 6%              |
| KRAS | G12R | c.34G>C (p.Gly12Arg) 21%             |
| KRAS | G12R | c.34G>C (p.Gly12Arg) 31%             |
| KRAS | G12R | c.34G>C (p. Gly12Arg) 15%            |
| KRAS | G12R | c.34G>C (p.Gly12Arg) 5%              |
| KRAS | G12V | c.35G>T (p.Gly12Val) 44%             |
| KRAS | G12V | c.35G>T (p.Gly12Val) 35%             |
| KRAS | G12V | c.33_35delTGinsGGT (p. Gly12Val) 15% |
| KRAS | G12V | c.35G>T (p.Gly12Val) 4%              |
| KRAS | G12V | c.35G>T (p.Gly12Val) 6%              |
| KRAS | G12V | c.35G>T (p.Gly12Val)                 |
| KRAS | G12V | c.35G>T (p. Gly12Val) 42%            |
| KRAS | G12V | c.35G>T (p. Gly12Val) 31%            |
| KRAS | G12V | c.35G>T (p.Gly12Val) 3%              |
| KRAS | G12V | c.35G>T (p.Gly12Val) 18%             |
| KRAS | G12V | c.35G>T (p.Gly12Val) 15%             |
| KRAS | G12V | c.35G>T (p.Gly12Val) 29%             |
| KRAS | G12V | c.35G>T (p.Gly12Val) 29%             |
| KRAS | G12V | c.35G>T (p.Gly12Val) 19%             |
| KRAS | G12V | c.35G>T (p.Gly12Val) 54%             |
| KRAS | G12V | c.35G>T (p.Gly12Val) 11%             |
| KRAS | G12V | c.35G>T (p.Gly12Val) 28%             |
| KRAS | G12V | c.35G>T (p.Gly12Val) 7%              |
| KRAS | G12V | c.35G>T (p.Gly12Val)                 |
| KRAS | G12V | c.35G>T (p.Gly12Val) 10%             |
| KRAS | G12V | c.35G>T (p. Gly12Val) 16%            |
| KRAS | G12V | c.35G>T (p.Gly12Val) 19%             |
| KRAS | G12V | c.35G>T (p.Gly12Val) 16%             |
| KRAS | G12V | c.35G>T (p.Gly12Val) 10%             |
| KRAS | G12V | c.35G>T (p.Gly12Val) 44%             |
| KRAS | G12V | c.35G>T (p.Gly12Val) 20%             |
| KRAS | G12V | c.35G>T (p. Gly12Val) 23%            |
| KRAS | G12V | c.35G>T (p.Gly12Val)                 |
| KRAS | G12V | c.35G>T (p.Gly12Val) 37%             |
| KRAS | G12V | c.35G>T (p.Gly12Val) 13%             |
| KRAS | G12V | c.35G>T (p.Gly12Val) 20%             |
| KRAS | G12V | c.35G>T (p.Gly12Val) 11%             |
| KRAS | G12V | c.35G>T (p.Gly12Val) 6%              |
| KRAS | G12V | c.35G>T (p.Gly12Val) 3%              |

|      |      |                           |
|------|------|---------------------------|
| KRAS | G12V | c.35G>T (p.Gly12Val) 17%  |
| KRAS | G12V | c.35G>T (p. Gly12Val) 28% |
| KRAS | G12V | c.35G>T (p.Gly12Val) 36%  |
| KRAS | G12V | c.35G>T (p.Gly12Val) 21%  |
| KRAS | G12V | c.35G>T (p.Gly12Val) 33%  |
| KRAS | G12V | c.35G>T (p.Gly12Val) 20%  |
| KRAS | G12V | c.35G>T (p.Gly12Val)      |
| KRAS | G12V | c.35G>T (p.Gly12Val)      |
| KRAS | G12V | c.35G>T (p.Gly12Val) 31%  |
| KRAS | G12V | c.35G>T (p.Gly12Val) 19%  |
| KRAS | G12V | c.35G>T (p.Gly12Val) 33%  |
| KRAS | G12V | c.35G>T (p.Gly12Val)      |
| KRAS | G12V | c.35G>T (p.Gly12Val) 8%   |
| KRAS | G12V | c.35G>T (p.Gly12Val) 7%   |
| KRAS | G12V | c.35G>T (p.Gly12Val) 55%  |
| KRAS | G12V | c.35G>T (p.Gly12Val) 5%   |
| KRAS | G12V | c.35G>T (p. Gly12Val) 12% |
| KRAS | G12V | c.35G>T (p.Gly12Val) 16%  |
| KRAS | G12V | c.35G>T (p.Gly12Val) 30%  |
| KRAS | G12V | c.35G>T (p.Gly12Val) 6%   |
| KRAS | G12V | c.35G>T (p.Gly12Val) 29%  |
| KRAS | G12V | c.35G>T (p. Gly12Val) 14% |
| KRAS | G12V | c.35G>T (p.Gly12Val)      |
| KRAS | G12V | c.35G>T (p.Gly12Val) 43%  |
| KRAS | G12V | c.35G>T (p.Gly12Val) 22%  |
| KRAS | G12V | c.35G>T (p.Gly12Val) 73%  |
| KRAS | G12V | c.35G>T (p.Gly12Val) 29%  |
| KRAS | G12V | c.35G>T (p.Gly12Val) 33%  |
| KRAS | G12V | c.35G>T (p.Gly12Val) 41%  |
| KRAS | G12V | c.35G>T (p.Gly12Val) 19%  |
| KRAS | G12V | c.35G>T (p.Gly12Val) 8%   |
| KRAS | G12V | c.35G>T (p.Gly12Val) 9%   |
| KRAS | G12V | c.35G>T (p.Gly12Val)      |
| KRAS | G12V | c.35G>T (p.Gly12Val)      |
| KRAS | G12V | c.35G>T (p.Gly12Val) 3%   |
| KRAS | G12V | c.35G>T (p.Gly12Val) 20%  |
| KRAS | G12V | c.35G>T (p.Gly12Val) 12%  |
| KRAS | G12V | c.35G>T (p.Gly12Val) 15%  |
| KRAS | G12V | c.35G>T (p.Gly12Val) 18%  |
| KRAS | G12V | c.35G>T (p.Gly12Val) 11%  |
| KRAS | G12V | c.35G>T (p.Gly12Val) 22%  |
| KRAS | G12V | c.35G>T (p.Gly12Val) 14%  |
| KRAS | G12V | c.35G>T (p.Gly12Val) 35%  |
| KRAS | G12V | c.35G>T (p.Gly12Val) 28%  |
| KRAS | G12V | c.35G>T (p.Gly12Val) 4%   |
| KRAS | G12V | c.35G>T (p.Gly12Val) 30%  |
| KRAS | G12V | c.35G>T (p.Gly12Val) 16%  |

|      |       |                                                     |
|------|-------|-----------------------------------------------------|
| KRAS | G12V  | c.35G>T (p.Gly12Val) 57%                            |
| KRAS | G12V  | c.35G>T (p.Gly12Val) 21%                            |
| KRAS | G12V  | c.35G>T (p.Gly12Val) 24%                            |
| KRAS | G12V  | c.35G>T (p.Gly12Val) 5%                             |
| KRAS | G12V  | c.34G>T (p.Gly12Val) 33%                            |
| KRAS | G12V  | c.35G>T (p.Gly12Val) 29%                            |
| KRAS | G12V  | c.35G>T (p.Gly12Val) 21%                            |
| KRAS | G12V  | c.35G>T (p.Gly12Val) 20%                            |
| KRAS | G13C  | c.37G>T (p.Gly13Cys) 27%                            |
| KRAS | G13C  | c.37G>T (p.Gly13Cys) 68%                            |
| KRAS | G13C  | c.37G>T (p.Gly13Cys) 19%                            |
| KRAS | G13C  | c.37G>T (p.Gly13Cys) 34%                            |
| KRAS | G13C  | c.37G>T (p.Gly13Cys) 28%                            |
| KRAS | G13C  | c.37G>T (p.Gly13Cys)                                |
| KRAS | G13C  | c.37G>T (p.Gly13Cys) 17%                            |
| KRAS | G13C  | c.37G>T (p.Gly13Cys) 28%                            |
| KRAS | G13C  | c.37G>T (p.Gly13Cys)                                |
| KRAS | G13C  | c.37G>T (p.Gly13Cys) 81%                            |
| KRAS | G13C  | c.36_37delTGinsGT (p.Gly13Cys) 18%                  |
| KRAS | G13C  | c.37G>T (p.Gly13Cys) 30%                            |
| KRAS | G13D  | c.38G>A (p.Gly13Asp) 49%                            |
| KRAS | G13D  | c.38G>A (p.Gly13Asp)                                |
| KRAS | G13D  | c.38_39delCGCinsAT (p.Gly13Asp) 74%                 |
| KRAS | G13D  | c.38G>A (p.Gly13Asp) 22%                            |
| KRAS | G13D  | c.38G>A (p.Gly13Asp)                                |
| KRAS | G13D  | c.38G>A (p.Gly13Asp) 9%                             |
| KRAS | G13D  | c.38G>A (p.Gly13Asp) 5%                             |
| KRAS | G13D  | c.38G>A (p.Gly13Asp) 60%                            |
| KRAS | G13D  | c.38G>A (p.Gly13Asp) 13%                            |
| KRAS | G13D  | c.38G>A (p.Gly13Asp) 4%                             |
| KRAS | OTHER | c.34G>A (p.Gly12Ser) 14%                            |
| KRAS | OTHER | c.34G>A (p.Gly12Ser) 8%                             |
| KRAS | OTHER | c.436G>A (p.Ala146Thr) 42%                          |
| KRAS | OTHER | c.176C>G (p.Ala59Gly) 20%                           |
| KRAS | OTHER | c.34G>A (p.Gly12Ser) 89%                            |
| KRAS | OTHER | c.437C>T (p.Ala146Val) 24%                          |
| KRAS | OTHER | c.38_39delGCinsTG (p.Gly13Val) 57%                  |
| KRAS | OTHER | c.57G>C (p.Leu19Phe) 8%                             |
| KRAS | OTHER | c.34G>A (p.Gly12Ser) 37%                            |
| KRAS | OTHER | c.34G>A (p.Gly12Ser) 28%                            |
| KRAS | OTHER | c.35_37delGTGinsCCT (p.Gly12_Gly13delinsAlaCys) 42% |
| KRAS | OTHER | c.34_35delGGinsTC (p.Gly12Ser) 10%                  |
| KRAS | OTHER | c.34G>A (p.Gly12Ser) 34%                            |
| KRAS | OTHER | c.437C>T (p.Ala146Val) 45%                          |
| KRAS | OTHER | c.57G>T (p.Leu19Phe) 30%                            |
| KRAS | OTHER | c.34G>A (p.Gly12Ser) 87%                            |
| KRAS | Q61H  | c.183A>C (p.Gln61His) 8%                            |

|        |                          |                               |
|--------|--------------------------|-------------------------------|
| KRAS   | Q61H                     | c.183A>C (p.Gln61His) 15%     |
| KRAS   | Q61H                     | c.183A>T (p.Gln61His) 16%     |
| KRAS   | Q61H                     | c.183A>T (p.Gln61His) 78%     |
| KRAS   | Q61H                     | c.183A>T (p.Gln61His)         |
| KRAS   | Q61H                     | c.183A>T (p.Gln61His) 42%     |
| KRAS   | Q61H                     | c.183A>C (p.Gln61His) 31%     |
| KRAS   | Q61H                     | c.183A>C (p.Gln61His) 71%     |
| KRAS   | Q61H                     | c.183A>T (p.Gln61His) 15%     |
| KRAS   | Q61H                     | c.183A>C (p.Gln61His) 45%     |
| KRAS   | Q61H                     | c.183A>C (p.Gln61His) 56%     |
| KRAS   | Q61H                     | c.183A>C (p. Gln61His) 26%    |
| KRAS   | Q61H                     | c.183A>C (p.Gln61His) 21%     |
| KRAS   | Q61H                     | c.183A>C (p.Gln61His) 50%     |
| KRAS   | Q61H                     | c.183A>T (p.Gln61His) 26%     |
| KRAS   | Q61H                     | c.183A>T (p.Gln61His) 41%     |
| KRAS   | Q61H                     | c.183A>C (p.Gln61His)         |
| KRAS   | Q61H                     | c.183A>C (p.Gln61His)         |
| KRAS   | Q61H                     | c.183A>C (p.Gln61His) 9%      |
| KRAS   | Q61H                     | c.183A>T (p.Gln61His) 30%     |
| KRAS   | Q61H                     | c.183A>C (p.Gln61His) 25%     |
| KRAS   | Q61H                     | c.183A>T (p.Gln61His) 12%     |
| KRAS   | Q61H                     | c.183A>C (p.Gln61His) 40%     |
| KRAS   | Q61H                     | c.183A>T (p.Gln61His) 6%      |
| KRAS   | Q61H                     | c.183A>C (p.Gln61His) 24%     |
| KRAS   | Q61H                     | c.183A>T (p.Gln61His) 8%      |
| KRAS   | Q61H                     | c.183A>C (p.Gln61His) 13%     |
| KRAS   | Q61H                     | c.183A>T (p.Gln61His) 21%     |
| KRAS   | Q61H                     | c.183A>T (p.Gln61His) 32%     |
| KRAS   | Q61H                     | c.183A>C (p.Gln61His) 11%     |
| KRAS   | Q61L                     | c.182A>T (p.Gln61Leu) 6%      |
| KRAS   | Q61L                     | c.182A>T (p.Gln61Leu) 3.5%    |
| KRAS   | Q61L                     | c.182A>T (p.Gln61Leu) 42%     |
| KRAS   | Q61L                     | c.182A>T (p.Gln61Leu) 8%      |
| KRAS   | Q61L                     | C.182A>T (p.Gln61Leu) 22%     |
| KRAS   | Q61L                     | c.182A>T (p.Gln61Leu) 40%     |
| KRAS   | Q61L                     | c.182A>T (p.Gln61Leu) 39%     |
| MET    | EXON 14 SPLICE SITE      | c.2942-29_2942-2del (p.?) 30% |
| MET    | EXON 14 SPLICE SITE      | c.3082+1G>T (p.?) 55%         |
| MET    | EXON 14 SKIPPING         | Unknown                       |
| MET    | NON-SPLICE SITE MISSENSE | c.2962C>T (p.Arg988Cys) 61%   |
| NRAS   | G12V                     | c.35G>T (p.Gly12Val) 32%      |
| NRAS   | G12V                     | c.35G>T (p.Gly12Val)          |
| NRAS   | Q61R                     | c.182A>G (p.Gln61Arg) 67%     |
| PI3KCA | A990G                    | c.2969C>G (p.Ala990Gly) 43%   |
| PI3KCA | D1029H                   | c.3085G>C (p.Asp1029His) 12%  |
| PI3KCA | E542K                    | c.1624G>A (p.Glu542Lys) 13%   |
| PI3KCA | E542K                    | c.1624G>A (p. Glu542Lys) 28%  |

|        |                           |                                      |
|--------|---------------------------|--------------------------------------|
| PI3KCA | E542K                     | c.1624G>A (p.Glu542Lys) 65%          |
| PI3KCA | E542K                     | c.1624G>A (p.Glu542Lys) 9%           |
| PI3KCA | E545G                     | c.1634A>G (p.Glu545Gly) 24%          |
| PI3KCA | E545K                     | c.1633G>A (p.Glu545Lys) 6%           |
| PI3KCA | E545K                     | Unknown                              |
| PI3KCA | E545K                     | c.1633G>A (p.Glu545Lys)              |
| PI3KCA | E545K                     | c.1633G>A (p.Glu545Lys) 19%          |
| PI3KCA | E545K                     | c.1633G>A (p.Glu545Lys) 12%          |
| PI3KCA | E545K                     | c.1633G>A (p.Glu545Lys) 10%          |
| PI3KCA | E545K                     | c.1633G>A (p.Glu545Lys) 5%           |
| PI3KCA | E545K                     | c.1633G>A (p. Glu545Lys) 14%         |
| PI3KCA | E545K                     | c.1633G>A (p.Glu545Lys) 31%          |
| PI3KCA | E545K                     | c.1633G>A (p.Glu545Lys) 11%          |
| PI3KCA | E545K                     | c.1633G>A (p. Glu545Lys) 23%         |
| PI3KCA | E545K                     | c.1633G>A (p.Glu545Lys) 14%          |
| PI3KCA | E545K                     | c.1633G>A (p.Glu545Lys) 21%          |
| PI3KCA | E545K                     | c.1633G>A (p.Glu545Lys) 18%          |
| PI3KCA | E545K                     | c.1633G>A (p.Glu545Lys) 9%           |
| PI3KCA | E545N                     | c.1633G>C (p.Glu545Gln) 11%          |
| PI3KCA | H1047L                    | c.3140A>T (p.His1047Leu) 10%         |
| PI3KCA | H1047L                    | c.3140A>T (p.His1047Leu) 46%         |
| PI3KCA | H1047L                    | c.3140A>T (p.His1047Leu) 27%         |
| PI3KCA | H1047L                    | c.3140A>T (p.His1047Leu) 23%         |
| PI3KCA | H1047L                    | c.3140A>T (p.His1047Leu) 26%         |
| PI3KCA | H1047L                    | c.3140A>T (p.His1047Leu) 14%         |
| PI3KCA | H1047R                    | c.3140A>G (p.His1047Arg) 3%          |
| PI3KCA | H1047R                    | c.3140A>G (p.His1047Arg) 18%         |
| PI3KCA | H1047R                    | c.3140A>G (p.His1047Arg) 21%         |
| PI3KCA | H1047R                    | c.3140A>G (p.His1047Arg) 19%         |
| PI3KCA | H1047R                    | c.3140A>G (p.His1047Arg) 12%         |
| PI3KCA | H1047R                    | c.3140A>G (p.His1047Arg) 15%         |
| PI3KCA | H1047R                    | c.3140A>G (p.His1047Arg) 6%          |
| PI3KCA | H1047R                    | c.3140A>G (p.His1047Arg) 44%         |
| PI3KCA | H1047R                    | c.3140A>G (p.His1047Arg) 10%         |
| PI3KCA | H1048R                    | c.3143A>G (p.His1048Arg) 24%         |
| PI3KCA | N1044K                    | c.3132T>A (p.Asn1044Lys) 24%         |
| PI3KCA | N345L                     | c.1035T>A (p.Asn345Lys) 5%           |
| PI3KCA | N515S                     | c.1544A>G (p.Asn515Ser) 51%          |
| PI3KCA | P539R                     | c.1616C>G (p.Pro539Arg) 6%           |
| PI3KCA | Q546K                     | c.1636C>A (p.Gln546Lys) 8%           |
| PI3KCA | T1021H                    | c.3061T>C (p. Tyr1021His) 34%        |
| PI3KCA | T1025S                    | c.3073A>T (p.Thr1025Ser) 33%         |
| RET    | NON-SENSE                 | c.2778dupT (p. Ile927Tyrfs*7) 11%    |
| RET    | SPLICE SITE VARIANT       | c.2801+2T>C (p.?) 10%                |
| TP53   | DISRUPTIVE NON-FUNCTIONAL | c.743G>A (p.Arg248Gln) 29%           |
| TP53   | DISRUPTIVE NOS            | c.177dupT (p.Pro60Serfs*3) 58%       |
| TP53   | DISRUPTIVE, FRAMESHIFT    | c.401_402insG (p.Phe134Leufs*15) 52% |

|      |                              |                                                   |
|------|------------------------------|---------------------------------------------------|
| TP53 | DISRUPTIVE, FRAMESHIFT       | c.432delG (p.Gln144Hisfs*26) 21%                  |
| TP53 | DISRUPTIVE, FRAMESHIFT       | c.1008_1020delGCGCTTCGAGATG (p.Glu336Aspfs*5) 35% |
| TP53 | DISRUPTIVE, FRAMESHIFT       | c.902dupC (p.Gly302Argfs*4) 15%                   |
| TP53 | DISRUPTIVE, FRAMESHIFT       | c.626_627delGA (p.Arg209Lysfs*6) 19%              |
| TP53 | DISRUPTIVE, FRAMESHIFT       | c.298delC (p.Gln100Argfs*23) 20%                  |
| TP53 | DISRUPTIVE, FRAMESHIFT       | c.880_881insT (p.Glu294Valfs*12) 8%               |
| TP53 | DISRUPTIVE, FRAMESHIFT       | c.1045delG (p.Glu349Asnfs*21) 17%                 |
| TP53 | DISRUPTIVE, FRAMESHIFT       | c.105_111delGCCGTCC (p.Leu35Phefs*7) 25%          |
| TP53 | DISRUPTIVE, FRAMESHIFT       | c.454_466delCCGCCCGCACCC (p.Pro152Alafs*14) (37%) |
| TP53 | DISRUPTIVE, FRAMESHIFT       | c.526_528delinsGG (p.Cys176Glyfs*71) 37%          |
| TP53 | DISRUPTIVE, FRAMESHIFT       | c.1124_1127delAGTC (p.Gln375Leufs*46) 22%         |
| TP53 | DISRUPTIVE, FRAMESHIFT       | c.603delG (p.Leu201Phefs*46) 38%                  |
| TP53 | DISRUPTIVE, FRAMESHIFT       | c.716delA (p.Asn239Thrfs*8) 95%                   |
| TP53 | DISRUPTIVE, FRAMESHIFT       | c.532delC (p.His178Thrfs*69) 38%                  |
| TP53 | DISRUPTIVE, FRAMESHIFT       | c.168_169delAGinsT, (p.Glu56Aspfs*67) 10%         |
| TP53 | DISRUPTIVE, FRAMESHIFT       | c.703_705delinsT (p.Asn235Leufs*4) 32%            |
| TP53 | DISRUPTIVE, FRAMESHIFT       | c.41_42delinsCCCTCA (p.Leu14Profs*16) 20%         |
| TP53 | DISRUPTIVE, FRAMESHIFT       | c.220delG (p.Ala74Profs*49) 23%                   |
| TP53 | DISRUPTIVE, FRAMESHIFT       | c.949delC (p.Gln317Serfs*28) 27%                  |
| TP53 | DISRUPTIVE, FRAMESHIFT       | c.1176dupA (p.Asp393Argfs*78) 50%                 |
| TP53 | DISRUPTIVE, FRAMESHIFT       | c.717_723delCAGTTCCinsGT (p.Asn239Lysfs*23) 35%   |
| TP53 | DISRUPTIVE, FRAMESHIFT       | c.715_716delAA (p.Asn239Glnfs*24) 78%             |
| TP53 | DISRUPTIVE, FRAMESHIFT       | c.848_849delGC (p.Arg283Hisfs*22) 6%              |
| TP53 | DISRUPTIVE, FRAMESHIFT       | c.120delC (p.Pro47Argfs*76) 40%                   |
| TP53 | DISRUPTIVE, FRAMESHIFT       | c.88_89delAA (p.Asn30Argfs*12) 34%                |
| TP53 | DISRUPTIVE, FRAMESHIFT       | c.102delC (p.Leu35Cysfs*9) 16%                    |
| TP53 | DISRUPTIVE, FRAMESHIFT       | c.1118delA (p.Lys373Argfs*49) (52%)               |
| TP53 | DISRUPTIVE, FUNCTIONAL       | c.566C>G (p.Ala189Gly) 58%                        |
| TP53 | DISRUPTIVE, GAIN OF FUNCTION | c.742C>T (p.Arg248Trp) 8%                         |
| TP53 | DISRUPTIVE, GAIN OF FUNCTION | c.527G>T (p.Cys176Phe) 10%                        |
| TP53 | DISRUPTIVE, GAIN OF FUNCTION | c.743G>A (p.Arg248Gln) 52%                        |
| TP53 | DISRUPTIVE, GAIN OF FUNCTION | c.559G>A (p.Gly187Ser) 12%                        |
| TP53 | DISRUPTIVE, GAIN OF FUNCTION | c.538G>A (p.Glu180Lys) 60%                        |
| TP53 | DISRUPTIVE, GAIN OF FUNCTION | c.536A>T (p.His179Leu) 20%                        |
| TP53 | DISRUPTIVE, GAIN OF FUNCTION | c.742C>T (p.Arg248Trp) 4%                         |
| TP53 | DISRUPTIVE, GAIN OF FUNCTION | c.743G>A (p.Arg248Gln) 49%                        |
| TP53 | DISRUPTIVE, GAIN OF FUNCTION | c.743G>A (p.Arg248Gln) 13%                        |
| TP53 | DISRUPTIVE, MISSENSE         | c.313G>T (p.Gly105Cys)                            |
| TP53 | DISRUPTIVE, NONFUNCTIONAL    | c.733G>C (p.Gly245Arg) 12%                        |
| TP53 | DISRUPTIVE, NONFUNCTIONAL    | c.706T>C (p.Tyr236His) 15%                        |
| TP53 | DISRUPTIVE, NONFUNCTIONAL    | c.581T>G (p.Leu194Arg) 40%                        |
| TP53 | DISRUPTIVE, NON-FUNCTIONAL   | c.743G>T (p.Arg248Leu) 38%                        |
| TP53 | DISRUPTIVE, NON-FUNCTIONAL   | c.799C>T (p.Arg267Trp) 54%                        |
| TP53 | DISRUPTIVE, NON-FUNCTIONAL   | c.728T>C (p.Met243Thr) 10%                        |
| TP53 | DISRUPTIVE, NON-FUNCTIONAL   | c.710T>A (p.Met237Lys) 31%                        |
| TP53 | DISRUPTIVE, NON-FUNCTIONAL   | c.743_744delGGinsTT (p.Arg248Leu) 6%              |
| TP53 | DISRUPTIVE, NON-FUNCTIONAL   | c.715A>G (p.Asn239Asp) 59%                        |

|      |                            |                                         |
|------|----------------------------|-----------------------------------------|
| TP53 | DISRUPTIVE, NON-FUNCTIONAL | c.584T>C (p.Ile195Thr) 55%              |
| TP53 | DISRUPTIVE, NON-FUNCTIONAL | c.724T>G (p.Cys242Gly) 33%              |
| TP53 | DISRUPTIVE, NON-FUNCTIONAL | c.584T>C (p.Ile195Thr) 19%              |
| TP53 | DISRUPTIVE, NON-FUNCTIONAL | c.733G>T (p.Gly245Cys) 69%              |
| TP53 | DISRUPTIVE, NON-FUNCTIONAL | c.733G>T (p.Gly245Cys) 82%              |
| TP53 | DISRUPTIVE, NON-FUNCTIONAL | c.518T>A (p.Val173Glu) 28%              |
| TP53 | DISRUPTIVE, NON-FUNCTIONAL | c.734G>T (p.Gly245Val) 34%              |
| TP53 | DISRUPTIVE, NON-FUNCTIONAL | c.1025G>C (p.Arg342Pro) 24%             |
| TP53 | DISRUPTIVE, NON-FUNCTIONAL | c.743G>T (p.Arg248Leu) 13%              |
| TP53 | DISRUPTIVE, NON-FUNCTIONAL | c.526T>C (p.Cys176Arg) 41%              |
| TP53 | DISRUPTIVE, NON-FUNCTIONAL | c.742C>G (p.Arg248Gly) 19%              |
| TP53 | DISRUPTIVE, NON-FUNCTIONAL | c.722C>T (p.Ser241Phe) 5%               |
| TP53 | DISRUPTIVE, NON-FUNCTIONAL | c.581T>G (p.Leu194Arg) 61%              |
| TP53 | DISRUPTIVE, NON-FUNCTIONAL | c.734G>T (p.Gly245Val) 27%              |
| TP53 | DISRUPTIVE, NON-FUNCTIONAL | c.745A>T (p.Arg249Trp) 79%              |
| TP53 | DISRUPTIVE, NON-FUNCTIONAL | c.737T>A (p.Met246Lys) 59%              |
| TP53 | DISRUPTIVE, NON-FUNCTIONAL | c.743_744delGGinsTT (p.Arg248Leu) 64%   |
| TP53 | DISRUPTIVE, NON-FUNCTIONAL | c.523C>G (p.Arg175Gly) 35%              |
| TP53 | DISRUPTIVE, NON-FUNCTIONAL | c.584T>C (p.Ile195Thr) 87%              |
| TP53 | DISRUPTIVE, NON-FUNCTIONAL | c.743G>C (p.Arg248Pro) 12%              |
| TP53 | DISRUPTIVE, NON-FUNCTIONAL | c.584T>C (p.Ile195Thr) 40%              |
| TP53 | DISRUPTIVE, NON-FUNCTIONAL | c.537T>A (p.His179Gln) 11%              |
| TP53 | DISRUPTIVE, NON-SENSE      | c.796T>G (p.Gly266*) 96%                |
| TP53 | DISRUPTIVE, NON-SENSE      | c.376-1G>A (p.?) 20%                    |
| TP53 | DISRUPTIVE, NON-SENSE      | c.747G>T (p.Arg249Ser) 43%              |
| TP53 | DISRUPTIVE, NON-SENSE      | c.574C>T (p.Gln192*)                    |
| TP53 | DISRUPTIVE, NON-SENSE      | c.742C>G (p.Arg248Gly) 29%              |
| TP53 | DISRUPTIVE, NON-SENSE      | c.142dupG (p.Asp48Glyfs*4) 85%          |
| TP53 | DISRUPTIVE, NON-SENSE      | c.742C>T (p.Arg248Trp) 95%              |
| TP53 | DISRUPTIVE, NON-SENSE      | c.949C>T (p.Gln317*)                    |
| TP53 | DISRUPTIVE, NON-SENSE      | c.934_935delAC (p.Thr312GLNfs*24) 43%   |
| TP53 | DISRUPTIVE, NON-SENSE      | c.818G>C (p.Arg273Pro) 15%              |
| TP53 | DISRUPTIVE, NON-SENSE      | c.853G>T (p.Glu285*)                    |
| TP53 | DISRUPTIVE, NON-SENSE      | c.425_430delCTGTGC (p.Pro142_Val143del) |
| TP53 | DISRUPTIVE, NON-SENSE      | c.617dupT (Leu206Phefs*3) 21%           |
| TP53 | DISRUPTIVE, NON-SENSE      | c.734G>A (p.Gly245Asp)                  |
| TP53 | DISRUPTIVE, NON-SENSE      | c.991C>T (p.Gln331*) 61%                |
| TP53 | DISRUPTIVE, NON-SENSE      | c.559+2T>C (p.?) 93%                    |
| TP53 | DISRUPTIVE, NON-SENSE      | c.321C>G (p.Tyr107*) 10%                |
| TP53 | DISRUPTIVE, NON-SENSE      | c.800G>C (p.Arg267Pro) 42%              |
| TP53 | DISRUPTIVE, NON-SENSE      | c.471_472insT (p.Arg158Serfs*23)        |
| TP53 | DISRUPTIVE, NON-SENSE      | c.717C>G (p.Asn239Lys) 48%              |
| TP53 | DISRUPTIVE, NON-SENSE      | c.796G>T (p.Gly266*)                    |
| TP53 | DISRUPTIVE, NON-SENSE      | c.592G>T (p.Glu198*) 44%                |
| TP53 | DISRUPTIVE, NON-SENSE      | c.880G>T (p.Glu294*) 33%                |
| TP53 | DISRUPTIVE, NON-SENSE      | c.871A>T (p.Lys291*) K291*              |
| TP53 | DISRUPTIVE, NON-SENSE      | c.712_713insTT (p.Cys238Phefs*10)       |

|      |                       |                                         |
|------|-----------------------|-----------------------------------------|
| TP53 | DISRUPTIVE, NON-SENSE | c.375+1G>T (p.?)                        |
| TP53 | DISRUPTIVE, NON-SENSE | c.535C>T (p.His179Tyr)                  |
| TP53 | DISRUPTIVE, NON-SENSE | c.273G>A (p.Trp91*) 32%                 |
| TP53 | DISRUPTIVE, NON-SENSE | c.673-1G>T (p.?) 68%                    |
| TP53 | DISRUPTIVE, NON-SENSE | c.586C>T (p.Arg196*) 53%                |
| TP53 | DISRUPTIVE, NON-SENSE | c.743G>A (p.Arg248Gln) 47%              |
| TP53 | DISRUPTIVE, NON-SENSE | c.112C>T (p.Gln38*) 21%                 |
| TP53 | DISRUPTIVE, NON-SENSE | c.725G>T (p.Cys242Phe) 23%              |
| TP53 | DISRUPTIVE, NON-SENSE | c.916C>T (p. Arg306*) 39%               |
| TP53 | DISRUPTIVE, NON-SENSE | c.586C>T (p.Arg196*) 23%                |
| TP53 | DISRUPTIVE, NON-SENSE | c.731G>A (p.Gly244Asp) 51%              |
| TP53 | DISRUPTIVE, NON-SENSE | c.461delG (p. Gly154Alafs*16) 67%       |
| TP53 | DISRUPTIVE, NON-SENSE | c.569delC (p. Pro190Leufs*57) 56%       |
| TP53 | DISRUPTIVE, NON-SENSE | c.584T>C (p.Ile195Thr) 15%              |
| TP53 | DISRUPTIVE, NON-SENSE | c.902delC (p.Pro301Glnfs*44) 9%         |
| TP53 | DISRUPTIVE, NON-SENSE | c.673-1G>T (p.?) 18%                    |
| TP53 | DISRUPTIVE, NON-SENSE | c.637_639delCGAinsTGG (p.Arg213Trp) 20% |
| TP53 | DISRUPTIVE, NON-SENSE | c.726C>A (p.Cys242*) 59%                |
| TP53 | DISRUPTIVE, NON-SENSE | c.267delC (p.Ser90Profs*33) 31%         |
| TP53 | DISRUPTIVE, NON-SENSE | c.991C>T (p.Gln331*) 13%                |
| TP53 | DISRUPTIVE, NON-SENSE | c.892G>T (p.Glu298*) 38%                |
| TP53 | DISRUPTIVE, NON-SENSE | c.112C>T (p.Gln38*) 36%                 |
| TP53 | DISRUPTIVE, NON-SENSE | c.863delA (p.Asn288Ilefs*57) 64%        |
| TP53 | DISRUPTIVE, NON-SENSE | c.475_476delGC (p.Ala159Hisfs*21) 16%   |
| TP53 | DISRUPTIVE, NON-SENSE | c.493C>T (p.Gln165*) 44%                |
| TP53 | DISRUPTIVE, NON-SENSE | c.673-2A>G (p.?) 67%                    |
| TP53 | DISRUPTIVE, NON-SENSE | c.375+1G>A (p.?) 12%                    |
| TP53 | DISRUPTIVE, NON-SENSE | c.375G>T (p.Thr125=) 10%                |
| TP53 | DISRUPTIVE, NON-SENSE | c.586C>T (p.Arg196*)                    |
| TP53 | DISRUPTIVE, NON-SENSE | c.418_419insTA (p.Thr140Ilefs*31) 21%   |
| TP53 | DISRUPTIVE, NON-SENSE | c.559+1G>A (p.?) 57%                    |
| TP53 | DISRUPTIVE, NON-SENSE | c.919+1G>T (p.?) 27%                    |
| TP53 | DISRUPTIVE, NON-SENSE | c.586C>T (p.Arg196*) 84%                |
| TP53 | DISRUPTIVE, NON-SENSE | c.216dupC (p.Val173Argfs*76) 63%        |
| TP53 | DISRUPTIVE, NON-SENSE | c.154C>T (p.Gln52*) 28%                 |
| TP53 | DISRUPTIVE, NON-SENSE | c.725G>T (p.Cys242Phe) 44%              |
| TP53 | DISRUPTIVE, NON-SENSE | c.576_578delGCA (p.Gln192del)           |
| TP53 | DISRUPTIVE, NON-SENSE | c.535C>T (p.His179Tyr) 8%               |
| TP53 | DISRUPTIVE, NON-SENSE | c.267delC (p.Ser90Profs*33) 17%         |
| TP53 | DISRUPTIVE, NON-SENSE | c.375G>T (p.Thr125=) 34%                |
| TP53 | DISRUPTIVE, NON-SENSE | c.1006G>T (p.Glu336*) 7%                |
| TP53 | DISRUPTIVE, NON-SENSE | c. 856G>C (p.Glu286Gln) 52%             |
| TP53 | DISRUPTIVE, NON-SENSE | c.988delC (p.Leu330Phefs*15)            |
| TP53 | DISRUPTIVE, NON-SENSE | c.993+1G>T 14%                          |
| TP53 | DISRUPTIVE, NON-SENSE | c.548C>G (p.Ser183*) 15%                |
| TP53 | DISRUPTIVE, NON-SENSE | c.586C>T (p.Arg196*) 23%                |
| TP53 | DISRUPTIVE, NON-SENSE | c.920-1G>T (p.?)                        |



|      |                       |                                                         |
|------|-----------------------|---------------------------------------------------------|
| TP53 | DISRUPTIVE, NON-SENSE | c.586C>T (p.Arg196*)                                    |
| TP53 | DISRUPTIVE, NON-SENSE | c.995T>A (p. Ile332Asn) 94%                             |
| TP53 | DISRUPTIVE, NON-SENSE | c.408delA (p.Gln136Hisfs*34)                            |
| TP53 | DISRUPTIVE, NON-SENSE | c.515T>A (p.Val172Asp) 19%                              |
| TP53 | DISRUPTIVE, NON-SENSE | c.955A>T (p.Lys319*) 19%                                |
| TP53 | DISRUPTIVE, NON-SENSE | c.818G>T (p.Arg273Leu) 10%                              |
| TP53 | DISRUPTIVE, NON-SENSE | c.991C>T (p.Gln331*) 18%                                |
| TP53 | DISRUPTIVE, NON-SENSE | c.880G>T (p.Glu294*) 16%                                |
| TP53 | DISRUPTIVE, NON-SENSE | c.722_723delinsT (p.Ser241Phefs*6) 29%                  |
| TP53 | DISRUPTIVE, NON-SENSE | c.592G>T (p.Glu198*)                                    |
| TP53 | DISRUPTIVE, NON-SENSE | c.375G>T (p.Thr125=) (14%)                              |
| TP53 | DISRUPTIVE, NON-SENSE | c.610dupG (p.Glu204Glyfs*5) 25%                         |
| TP53 | DISRUPTIVE, NON-SENSE | c.499C>T (p.Gln167*) 34%                                |
| TP53 | DISRUPTIVE, NON-SENSE | c.746G>C (p.Arg249Thr) 15%                              |
| TP53 | DISRUPTIVE, NON-SENSE | c.455delC (p.Pro152Argfs*18) 6%                         |
| TP53 | DISRUPTIVE, NON-SENSE | c.745A>G (p.Arg249Gly) 18%                              |
| TP53 | DISRUPTIVE, NON-SENSE | c.586C>T (p.Arg196*) 41%                                |
| TP53 | DISRUPTIVE, NON-SENSE | c.734G>A (p.Gly245Asp)                                  |
| TP53 | DISRUPTIVE, NON-SENSE | c.949C>T (p.Gln317*)                                    |
| TP53 | DISRUPTIVE, NON-SENSE | c.796G>T (p.Gly266*) 70%                                |
| TP53 | DISRUPTIVE, NON-SENSE | c.152_158delAACAATG (p.Glu51Glyfs*70)                   |
| TP53 | DISRUPTIVE, NON-SENSE | c.102dupC (p.Pro36Alafs*7)                              |
| TP53 | DISRUPTIVE, NON-SENSE | c.281C>G (p.Ser94*) 69%                                 |
| TP53 | DISRUPTIVE, NON-SENSE | c.725G>T (p.Cys242Phe) 69%                              |
| TP53 | DISRUPTIVE, NON-SENSE | c.711_713delGTGinsTTT (p.Met237_Cys238delinsIlePhe) 49% |
| TP53 | DISRUPTIVE, NON-SENSE | c.522G>T (p.Arg174Ser) 57%                              |
| TP53 | DISRUPTIVE, NON-SENSE | c.637C>T (p.Arg213*) 81%                                |
| TP53 | DISRUPTIVE, NON-SENSE | c.560-1G>T (p.?)                                        |
| TP53 | DISRUPTIVE, NON-SENSE | c.874A>T (p.Lys292*)                                    |
| TP53 | DISRUPTIVE, NON-SENSE | c.1006G>T (p.Glu336*) 58%                               |
| TP53 | DISRUPTIVE, NON-SENSE | c.718A>G (p. Ser240Gly) 11%                             |
| TP53 | DISRUPTIVE, NON-SENSE | c.797G>A (p.Gly266Glu) 23%                              |
| TP53 | DISRUPTIVE, NON-SENSE | c.831T>A (p.Cys277*) 31%                                |
| TP53 | DISRUPTIVE, NON-SENSE | c.672+1G>T (p.?) 65%                                    |
| TP53 | DISRUPTIVE, NON-SENSE | c.592delG (p.Glu198Lysfs*49) 14%                        |
| TP53 | DISRUPTIVE, NON-SENSE | c.202G>T (p.Glu68*) 26%                                 |
| TP53 | DISRUPTIVE, NON-SENSE | c.610G>T (p.Glu204*) 16%                                |
| TP53 | DISRUPTIVE, NON-SENSE | c.825_832delTGCCTGTCinsAGGTG (p.Cys275*) 87%            |
| TP53 | DISRUPTIVE, NON-SENSE | c.614A>G (p.Tyr205Cys) 15%                              |
| TP53 | DISRUPTIVE, NON-SENSE | c.721T>G (p.Ser241Ala) 43%                              |
| TP53 | DISRUPTIVE, NON-SENSE | c.742C>T (p.Arg248Trp) 54%                              |
| TP53 | DISRUPTIVE, NON-SENSE | c.459delC (p.Gly154Alafs*16) 29%                        |
| TP53 | DISRUPTIVE, NON-SENSE | c.1024C>T (p.Arg342*) 50%                               |
| TP53 | DISRUPTIVE, NON-SENSE | c.314dupG (p.Ser106Glnfs*43) 41%                        |
| TP53 | DISRUPTIVE, NON-SENSE | c.535C>T (p.His179Tyr) 47%                              |
| TP53 | DISRUPTIVE, NON-SENSE | c.602T>A (p.Leu201*) 23%                                |
| TP53 | DISRUPTIVE, NON-SENSE | c.673-2A>C (p?) 19%                                     |

|      |                       |                                                                |
|------|-----------------------|----------------------------------------------------------------|
| TP53 | DISRUPTIVE, NON-SENSE | c.326delT (p.Phe109Serfs*14) 37%                               |
| TP53 | DISRUPTIVE, NON-SENSE | c.839G>T (p.Arg280Ile) 71%                                     |
| TP53 | DISRUPTIVE, NON-SENSE | c.365_366delTG (p.Val122Aspfs*26)                              |
| TP53 | DISRUPTIVE, NON-SENSE | c.811G>T (p.Glu271*) 11%                                       |
| TP53 | DISRUPTIVE, NON-SENSE | c.811G>T (p.Glu21*) 11%                                        |
| TP53 | DISRUPTIVE, NON-SENSE | c.96+2T>G (p.?)                                                |
| TP53 | DISRUPTIVE, NON-SENSE | c.1045G>T (p.Glu349*) 70%                                      |
| TP53 | DISRUPTIVE, NON-SENSE | c.574C>T (p.Gln192*)                                           |
| TP53 | DISRUPTIVE, NON-SENSE | c.529C>T (p.Pro177Ser) 16%                                     |
| TP53 | DISRUPTIVE, NON-SENSE | c.554_559delinsT (p.Ser185Metfs*22) 81%                        |
| TP53 | DISRUPTIVE, NON-SENSE | c.1045G>T (p.Glu349*)                                          |
| TP53 | DISRUPTIVE, NON-SENSE | c.747_748delGCinsTT (p.Arg249_Pro250delinsSerSer) 58%          |
| TP53 | DISRUPTIVE, NON-SENSE | c.560-2A>T (p.?)                                               |
| TP53 | DISRUPTIVE, NON-SENSE | c.919+1G>T (p.?)                                               |
| TP53 | DISRUPTIVE, NON-SENSE | c.734G>T (p.Gly245Val)                                         |
| TP53 | DISRUPTIVE, NON-SENSE | c.859delG (p.Glu287Argfs*58) 31%                               |
| TP53 | DISRUPTIVE, NON-SENSE | c.270delC (p.Trp91Glyfs*32)                                    |
| TP53 | DISRUPTIVE, NON-SENSE | c.97-2A>G (p.?)                                                |
| TP53 | DISRUPTIVE, NON-SENSE | c.742C>T (p.Arg248Trp) 21%                                     |
| TP53 | DISRUPTIVE, NON-SENSE | c.782_782+14delGGTCAGGAGCCACTTdelinsCTG (p.Ser261Thrfs*85) 61% |
| TP53 | DISRUPTIVE, NON-SENSE | c.490A>T (p.Lys164*) 30%                                       |
| TP53 | DISRUPTIVE, NON-SENSE | c.542G>C (p.Arg181Pro)                                         |
| TP53 | DISRUPTIVE, NON-SENSE | c.303_307delinsC (p.Lys101Asnfs*21)                            |
| TP53 | DISRUPTIVE, NON-SENSE | c.796G>T (p.Gly266*)                                           |
| TP53 | DISRUPTIVE, NON-SENSE | c.602dupT (p.Leu201Phefs*8)                                    |
| TP53 | DISRUPTIVE, NON-SENSE | c.637C>T (p.Arg213*) 21%                                       |
| TP53 | DISRUPTIVE, NON-SENSE | c.772G>T (p.Glu258*) 16%                                       |
| TP53 | DISRUPTIVE, NON-SENSE | c.991C>T (p.Gln331*) 17%                                       |
| TP53 | DISRUPTIVE, NON-SENSE | c.880G>T (p.Glu294*) 65%                                       |
| TP53 | DISRUPTIVE, NON-SENSE | c.991C>T (p.Gln331*) 20%                                       |
| TP53 | DISRUPTIVE, NON-SENSE | c.586C>T (p.Arg196*) 82%                                       |
| TP53 | DISRUPTIVE, NON-SENSE | c.637C>T (p.Arg213*) 32%                                       |
| TP53 | DISRUPTIVE, NON-SENSE | c.1036G>T (p.Glu346*) 17%                                      |
| TP53 | DISRUPTIVE, NON-SENSE | c.158G>A (p.Trp53*) 34%                                        |
| TP53 | DISRUPTIVE, NON-SENSE | c.916C>T (p.Arg306*) 30%                                       |
| TP53 | DISRUPTIVE, NON-SENSE | c.637C>T (p.Arg213*) 71%                                       |
| TP53 | DISRUPTIVE, NON-SENSE | c.725G>T (p.Cys242Phe) 6%                                      |
| TP53 | DISRUPTIVE, NON-SENSE | c.892G>T (p.Glu298*) 20%                                       |
| TP53 | DISRUPTIVE, NON-SENSE | c.437G>A (p.Trp146*) 41%                                       |
| TP53 | DISRUPTIVE, NON-SENSE | c.637C>T (p.Arg213*) 39%                                       |
| TP53 | DISRUPTIVE, NON-SENSE | c.461delG (p.Gly154Alafs*16) 48%                               |
| TP53 | DISRUPTIVE, NON-SENSE | c.743G>C (p.Arg248Pro) 30%                                     |
| TP53 | DISRUPTIVE, NON-SENSE | c.994-1G>T (p.?) 10%                                           |
| TP53 | DISRUPTIVE, NON-SENSE | c.571_577delCCTCAGC (p.Pro191Ilefs*54)                         |
| TP53 | DISRUPTIVE, NON-SENSE | c.541C>T (p.Arg181Cys)                                         |
| TP53 | DISRUPTIVE, NON-SENSE | c.375G>T (p.Thr125=)                                           |
| TP53 | DISRUPTIVE, NON-SENSE | c.743G>A (p.Arg248Gln)                                         |

|      |                       |                                                               |
|------|-----------------------|---------------------------------------------------------------|
| TP53 | DISRUPTIVE, NON-SENSE | c.560-1G>A (p.?) 20%                                          |
| TP53 | DISRUPTIVE, NON-SENSE | c.637C>T (p.Arg213*) 45%                                      |
| TP53 | DISRUPTIVE, NON-SENSE | c.1022dupT (p.Arg342Profs*5) 62%                              |
| TP53 | DISRUPTIVE, NOS       | c.870_873delCAAG (p.Lys292Glyfs*52) 16%                       |
| TP53 | DISRUPTIVE, NOS       | c.916C>T (p.Arg306*) 9%                                       |
| TP53 | DISRUPTIVE, NOS       | c.783-1G>T (p.?) 42%                                          |
| TP53 | DISRUPTIVE, NOS       | c.752T>G (p.Ile251Ser) 32%                                    |
| TP53 | DISRUPTIVE, NOS       | c.705delC (p.Tyr236Thrfs*11) 57%                              |
| TP53 | DISRUPTIVE, NOS       | c.592G>T (p.Glu198*) 50%                                      |
| TP53 | DISRUPTIVE, NOS       | c.673_2A>G (p.?) 10%                                          |
| TP53 | DISRUPTIVE, NOS       | c.880_892delGAGCCTCACCACG (p.Glu294Serfs*47) 47%              |
| TP53 | DISRUPTIVE, NOS       | c.294_297delTTCC (p.Ser99Argfs*23) 23%                        |
| TP53 | DISRUPTIVE, NOS       | c.473delG (p.Arg158Profs*12) 56%                              |
| TP53 | DISRUPTIVE, NOS       | c.375G>T (p.?) 22%                                            |
| TP53 | DISRUPTIVE, NOS       | c.1015G>T (p.Glu339*) 26%                                     |
| TP53 | DISRUPTIVE, NOS       | c.920-2A>G (p.?) 19%                                          |
| TP53 | DISRUPTIVE, NOS       | c.338_348delTCTTGCATTCT (p.Phe113Trpfs*32) 57%                |
| TP53 | DISRUPTIVE, NOS       | c.660T>G (p.Tyr220*) 24%                                      |
| TP53 | DISRUPTIVE, NOS       | c.455dupC (p.Pro153Alafs*28) 31%                              |
| TP53 | DISRUPTIVE, NOS       | c.747_748delGCinsTA (p.Arg249_Pro250delinsSerThr) 33%         |
| TP53 | DISRUPTIVE, NOS       | c.920-2A>T (p.?) 10%                                          |
| TP53 | DISRUPTIVE, NOS       | c.782+1G>T (p.?) 13%                                          |
| TP53 | DISRUPTIVE, NOS       | c.740A>T (p.Asn247Ile) 29%                                    |
| TP53 | DISRUPTIVE, NOS       | c.920-11_927delCTCTTTCCTAGCACTGCCC (p.?) 12%                  |
| TP53 | DISRUPTIVE, NOS       | c.672+2T>A (p.?) 19%                                          |
| TP53 | DISRUPTIVE, NOS       | c.920-2A>G (p.?) 25%                                          |
| TP53 | DISRUPTIVE, NOS       | c.787_790delAATC (p.Asn263Tyrfs*81) 72%                       |
| TP53 | DISRUPTIVE, NOS       | c.919_919+1delinsAT (p.?) 16%                                 |
| TP53 | DISRUPTIVE, NOS       | c.439delG (p.Val147Leufs*23) 15%                              |
| TP53 | DISRUPTIVE, NOS       | c.919+2T>A (p.?) 9%                                           |
| TP53 | DISRUPTIVE, NOS       | c.96+1G>A (p.?) 38%                                           |
| TP53 | DISRUPTIVE, NOS       | c.948_957delCCAGCCAAAG (p.Gln317Argfs*25) 74%                 |
| TP53 | DISRUPTIVE, NOS       | c.430C>T (p.Gln144*) 93%                                      |
| TP53 | DISRUPTIVE, NOS       | c.734G>A (p.Gly245Asp) 28%                                    |
| TP53 | DISRUPTIVE, NOS       | c.734G>A (p.Gly245Asp) 32%                                    |
| TP53 | DISRUPTIVE, NOS       | c.714_715delTAinsGT (p.Cys238_Asn239delinsTrpTyr) 20%         |
| TP53 | DISRUPTIVE, NOS       | c.783-2A>G (p.?) 60%                                          |
| TP53 | DISRUPTIVE, NOS       | c.375+1G>T (p.?) 64%                                          |
| TP53 | DISRUPTIVE, NOS       | c.797delG (p.Gly266Aspfs*79) 29%                              |
| TP53 | DISRUPTIVE, NOS       | c.916C>T (p.Arg306*) 26%                                      |
| TP53 | DISRUPTIVE, NOS       | c.920-2A>C (p.?) 50%                                          |
| TP53 | DISRUPTIVE, NOS       | c.376-2A>T (p.?) 39%                                          |
| TP53 | DISRUPTIVE, NOS       | c.376-2A>G (p.?) 30%                                          |
| TP53 | DISRUPTIVE, NOS       | c.473_490delGCGCCATGGCCATCTACA (p.Arg158_Lys164delinsGln) 32% |
| TP53 | DISRUPTIVE, NOS       | c.559+1G>T (p.?) 18%                                          |
| TP53 | DISRUPTIVE, NOS       | c.118_130dupATGGATGATTTGA (p.Met44Asnfs*3) 35%                |
| TP53 | DISRUPTIVE, NOS       | c.994-1G>C (p.?) 17%                                          |

|      |                                  |                                                 |
|------|----------------------------------|-------------------------------------------------|
| TP53 | DISRUPTIVE, NOS                  | c.783-1G>T (p.?) 41%                            |
| TP53 | DISRUPTIVE, NOS                  | c.625A>T (p.Arg209*) 79%                        |
| TP53 | DISRUPTIVE, NOS                  | c.642_643delTA (p.His214Glnfs*7) 7%             |
| TP53 | DISRUPTIVE, NOS                  | c.586C>T (p.Arg196*) 27%                        |
| TP53 | DISRUPTIVE, NOS                  | c.375G>T (p.Thr125=) 22%                        |
| TP53 | DISRUPTIVE, NOS                  | c.310C>T (p.Gln104*) 16%                        |
| TP53 | DISRUPTIVE, NOS                  | c.560-1G>T (p.?) 53%                            |
| TP53 | DISRUPTIVE, NOS                  | c.375+1delG (p.?) 33%                           |
| TP53 | DISRUPTIVE, NOS                  | c.757A>G (p.Thr253Ala) 22%                      |
| TP53 | DISRUPTIVE, NOS                  | c.515_522dupTTGTGAGG (p.Arg175Leufs*2) 20%      |
| TP53 | DISRUPTIVE, NOS                  | c.782+1delG (p.?) 79%                           |
| TP53 | DISRUPTIVE, NOS                  | c.741_750delinsA p.(Asn247_Pro250delinsLys) 16% |
| TP53 | DISRUPTIVE, NOS                  | c.920-6_921delTCCTAGCA (p.?) 36%                |
| TP53 | DISRUPTIVE, NOS                  | c.993+1G>T (p.?) 48%                            |
| TP53 | DISRUPTIVE, NOS                  | c.393_399delCAAGATG (p.Lys132Phefs*36) 12%      |
| TP53 | DISRUPTIVE, NOS                  | c.981T>A (p.Tyr327*) 9%                         |
| TP53 | DISRUPTIVE, PARTIALLY FUNCTIONAL | c.527G>T (p.Cys176Phe) 95%                      |
| TP53 | DISRUPTIVE, PARTIALLY FUNCTIONAL | c.535C>T (p.His179Tyr) 90%                      |
| TP53 | DISRUPTIVE, PARTIALLY FUNCTIONAL | c.542G>A (p.Arg181His) 12%                      |
| TP53 | DISRUPTIVE, PARTIALLY FUNCTIONAL | c.538G>A (p.Glu180Lys) 81%                      |
| TP53 | DISRUPTIVE, PARTIALLY FUNCTIONAL | c.527G>T (p.Cys176Phe) 20%                      |
| TP53 | DISRUPTIVE, PARTIALLY FUNCTIONAL | c.535C>T (p.His179Tyr) 97%                      |
| TP53 | DISRUPTIVE, SPLICE SITE          | c.920-1G>T (p.?) 37%                            |
| TP53 | DISRUPTIVE, SPLICE SITE          | c.920-1G>T (p.?) 11%                            |
| TP53 | DISRUPTIVE, SPLICE SITE          | c.994-1G>T (p.?) 16%                            |
| TP53 | DISRUPTIVE, SPLICE SITE          | c.375G>T (p.Thr125=) 5%                         |
| TP53 | DISRUPTIVE, SPLICE SITE          | c.375G>T (p.Thr125=) 23%                        |
| TP53 | DISRUPTIVE, SPLICE SITE          | c.993+1G>T (p.?) 24%                            |
| TP53 | DISRUPTIVE, SPLICE SITE          | c.993+1G>T (p.?) 29%                            |
| TP53 | DISRUPTIVE, SPLICE SITE          | c.783-1G>T (p.?) 18%                            |
| TP53 | DISRUPTIVE, SPLICE SITE          | c.375G>T (p.Thr125=) 35%                        |
| TP53 | DISRUPTIVE, SPLICE SITE          | c.673-2A>T (p.?) 55%                            |
| TP53 | DISRUPTIVE, SPLICE SITE          | c.376-1G>A (p.?) 25%                            |
| TP53 | DISRUPTIVE, SPLICE SITE          | c.375G>T (p.Thr125=) 26%                        |
| TP53 | DISRUPTIVE, SPLICE SITE          | c.920-2A>G (p.?) 56%                            |
| TP53 | DISRUPTIVE, SPLICE SITE          | c.559+1G>T (p.?) 9%                             |
| TP53 | DISRUPTIVE, SPLICE SITE          | c.993+1G>A (p.?) 37%                            |
| TP53 | NON-DISRUPTIVE, FUNCTIONAL       | c.100C>A (p.Pro34Thr) 6%                        |
| TP53 | NON-DISRUPTIVE, FUNCTIONAL       | c.100C>A (p.Pro34Thr) 6%                        |
| TP53 | NON-DISRUPTIVE, FUNCTIONAL       | c.993G>T (p.Gln331His) 18%                      |
| TP53 | NON-DISRUPTIVE, FUNCTIONAL       | c.672G>T (p.Glu224Asp) 44%                      |
| TP53 | NON-DISRUPTIVE, GAIN OF FUNCTION | c.733G>A (p.Gly245Ser) 59%                      |
| TP53 | NON-DISRUPTIVE, GAIN OF FUNCTION | c.820G>T (p.Val274Phe) 21%                      |
| TP53 | NON-DISRUPTIVE, GAIN OF FUNCTION | c.818G>A (p.Arg273His) 40%                      |
| TP53 | NON-DISRUPTIVE, GAIN OF FUNCTION | c.538G>A (p.Glu180Lys)                          |
| TP53 | NON-DISRUPTIVE, GAIN OF FUNCTION | c.734G>T (p. Gly245Val) 20%                     |
| TP53 | NON-DISRUPTIVE, GAIN OF FUNCTION | c.832C>T (p.Pro278Ser) 5%                       |

|      |                                  |                             |
|------|----------------------------------|-----------------------------|
| TP53 | NON-DISRUPTIVE, GAIN OF FUNCTION | c.1096T>G (p.ser366Ala) 39% |
| TP53 | NON-DISRUPTIVE, GAIN OF FUNCTION | c.524G>A (p.Arg175His) 33%  |
| TP53 | NON-DISRUPTIVE, GAIN OF FUNCTION | c.1039G>A (p.Ala347Thr) 19% |
| TP53 | NON-DISRUPTIVE, GAIN OF FUNCTION | c.747G>T (p.Arg249Ser) 7%   |
| TP53 | NON-DISRUPTIVE, GAIN OF FUNCTION | c.524G>A (p.Arg175His) 45%  |
| TP53 | NON-DISRUPTIVE, GAIN OF FUNCTION | c.818G>A (p.Arg273His) 36%  |
| TP53 | NON-DISRUPTIVE, GAIN OF FUNCTION | c.524G>A (p.Arg175His) 74%  |
| TP53 | NON-DISRUPTIVE, GAIN OF FUNCTION | c.839G>A (p.Arg280Lys) 28%  |
| TP53 | NON-DISRUPTIVE, GAIN OF FUNCTION | c.817C>T (p.Arg273Cys) 32%  |
| TP53 | NON-DISRUPTIVE, GAIN OF FUNCTION | c.844C>T (p.Arg282Trp)      |
| TP53 | NON-DISRUPTIVE, GAIN OF FUNCTION | c.817C>T (p.Arg273Cys) 19%  |
| TP53 | NON-DISRUPTIVE, GAIN OF FUNCTION | c.569C>T (p.Pro190Leu) 58%  |
| TP53 | NON-DISRUPTIVE, GAIN OF FUNCTION | c. 487T>C (p.Tyr163His) 65% |
| TP53 | NON-DISRUPTIVE, GAIN OF FUNCTION | c. 469G>T (p.Val157Phe) 30% |
| TP53 | NON-DISRUPTIVE, GAIN OF FUNCTION | c.1001G>T (p.Gly334Val) 89% |
| TP53 | NON-DISRUPTIVE, GAIN OF FUNCTION | c.747G>T (p.Arg249Ser) 27%  |
| TP53 | NON-DISRUPTIVE, GAIN OF FUNCTION | c.832C>T (p.Pro278Ser) 82%  |
| TP53 | NON-DISRUPTIVE, GAIN OF FUNCTION | c.818G>A (p.Arg273His) 18%  |
| TP53 | NON-DISRUPTIVE, GAIN OF FUNCTION | c.733G>A (p.Gly245Ser) 49%  |
| TP53 | NON-DISRUPTIVE, GAIN OF FUNCTION | c.839G>C (p.Arg280Thr) 48%  |
| TP53 | NON-DISRUPTIVE, GAIN OF FUNCTION | c.839G>C (p.Arg280Thr) 10%  |
| TP53 | NON-DISRUPTIVE, GAIN OF FUNCTION | c.818G>A (p.Arg273His) 10%  |
| TP53 | NON-DISRUPTIVE, GAIN OF FUNCTION | c.747G>T (p.Arg249Ser) 39%  |
| TP53 | NON-DISRUPTIVE, GAIN OF FUNCTION | c.524G>A (p.Arg175His) 5%   |
| TP53 | NON-DISRUPTIVE, GAIN OF FUNCTION | c.817C>T (p.Arg273Cys) 16%  |
| TP53 | NON-DISRUPTIVE, GAIN OF FUNCTION | c.832C>T (p.Pro278Ser) 96%  |
| TP53 | NON-DISRUPTIVE, GAIN OF FUNCTION | c. 730G>T (p.Gly244Cys) 26% |
| TP53 | NON-DISRUPTIVE, GAIN OF FUNCTION | c.375+1G>T (p. ?) 11%       |
| TP53 | NON-DISRUPTIVE, GAIN OF FUNCTION | c.818G>A (p.Arg273His) 24%  |
| TP53 | NON-DISRUPTIVE, GAIN OF FUNCTION | c.524G>A (p.Arg175His) 11%  |
| TP53 | NON-DISRUPTIVE, GAIN OF FUNCTION | c.733G>A (p.Gly245Ser)      |
| TP53 | NON-DISRUPTIVE, GAIN OF FUNCTION | c.524G>A (p.Arg175His)      |
| TP53 | NON-DISRUPTIVE, GAIN OF FUNCTION | c. 413C>T (p.Ala138Val) 42% |
| TP53 | NON-DISRUPTIVE, GAIN OF FUNCTION | c.747G>T (p.Arg249Ser) 49%  |
| TP53 | NON-DISRUPTIVE, GAIN OF FUNCTION | c.314G>A (p.Gly105Asp) 57%  |
| TP53 | NON-DISRUPTIVE, GAIN OF FUNCTION | c.733G>A (p.Gly245Ser) 13%  |
| TP53 | NON-DISRUPTIVE, GAIN OF FUNCTION | c.844C>T (p.Arg282Trp) 25%  |
| TP53 | NON-DISRUPTIVE, GAIN OF FUNCTION | c.818G>A (p.Arg273His) 40%  |
| TP53 | NON-DISRUPTIVE, GAIN OF FUNCTION | c.820G>T (p.Val274Phe) 58%  |
| TP53 | NON-DISRUPTIVE, GAIN OF FUNCTION | c.524G>A (p.Arg175His) 11%  |
| TP53 | NON-DISRUPTIVE, GAIN OF FUNCTION | c.800G>C (p.Arg267Pro) 11%  |
| TP53 | NON-DISRUPTIVE, GAIN OF FUNCTION | c.747G>T (p.Arg249Ser) 29%  |
| TP53 | NON-DISRUPTIVE, GAIN OF FUNCTION | c.818G>A (p.Arg273His) 20%  |
| TP53 | NON-DISRUPTIVE, GAIN OF FUNCTION | c.839G>C (p.Arg280Thr) 37%  |
| TP53 | NON-DISRUPTIVE, GAIN OF FUNCTION | c.104T>G (p.Leu348Trp) 84%  |
| TP53 | NON-DISRUPTIVE, GAIN OF FUNCTION | c.1001G>T (p.Gly334Val) 13% |
| TP53 | NON-DISRUPTIVE, GAIN OF FUNCTION | c.842A>G (p.Asp281Gly) 14%  |

|      |                                   |                                   |
|------|-----------------------------------|-----------------------------------|
| TP53 | NON-DISRUPTIVE, GAIN OF FUNCTION  | c.842A>G (p.Asp281Gly) 87%        |
| TP53 | NON-DISRUPTIVE, IN-FRAME DELETION | c.393_395delCAA (p.Asn131del) 15% |
| TP53 | NON-DISRUPTIVE, MISSENSE          | c.734G>C (p.Gly245Ala) 27%        |
| TP53 | NON-DISRUPTIVE, MISSENSE          | c.79C>T (p.Pro27Ser) 28%          |
| TP53 | NON-DISRUPTIVE, NON-FUNCTIONAL    | c.1010G>T (p.Arg337Leu) 13%       |
| TP53 | NON-DISRUPTIVE, NON-FUNCTIONAL    | c.797G>T (p.Gly266Val) 38%        |
| TP53 | NON-DISRUPTIVE, NON-FUNCTIONAL    | c.854A>T (p.Glu285Val)            |
| TP53 | NON-DISRUPTIVE, NON-FUNCTIONAL    | c.536A>G (p.His179Arg) 39%        |
| TP53 | NON-DISRUPTIVE, NON-FUNCTIONAL    | c.451C>T (p.Pro151Ser)            |
| TP53 | NON-DISRUPTIVE, NON-FUNCTIONAL    | c.694A>T (p.Ile232Phe)            |
| TP53 | NON-DISRUPTIVE, NON-FUNCTIONAL    | c.817C>T (p.Arg273Cis) 15%        |
| TP53 | NON-DISRUPTIVE, NON-FUNCTIONAL    | c.488A>G (p.Tyr163Cys) 94%        |
| TP53 | NON-DISRUPTIVE, NON-FUNCTIONAL    | c.772G>A (p.Glu258Lys)            |
| TP53 | NON-DISRUPTIVE, NON-FUNCTIONAL    | c.583A>T (p.Ile195Phe) 61%        |
| TP53 | NON-DISRUPTIVE, NON-FUNCTIONAL    | c.319T>C (p.Tyr107His) 25%        |
| TP53 | NON-DISRUPTIVE, NON-FUNCTIONAL    | c.743G>T (p.Arg248Leu) 32%        |
| TP53 | NON-DISRUPTIVE, NON-FUNCTIONAL    | c.794T>C (p.Leu265Pro) 11%        |
| TP53 | NON-DISRUPTIVE, NON-FUNCTIONAL    | c.797G>T (p.Gly266Val) 17%        |
| TP53 | NON-DISRUPTIVE, NON-FUNCTIONAL    | c.815T>G (p.Val272Gly)            |
| TP53 | NON-DISRUPTIVE, NON-FUNCTIONAL    | c.722C>G (p.Ser241Cys) 16%        |
| TP53 | NON-DISRUPTIVE, NON-FUNCTIONAL    | c.842A>C (p.Asp281Ala) 16%        |
| TP53 | NON-DISRUPTIVE, NON-FUNCTIONAL    | c.772G>T (p.Glu258*) 32%          |
| TP53 | NON-DISRUPTIVE, NON-FUNCTIONAL    | c.713G>A (p.Cys238Tyr) 25%        |
| TP53 | NON-DISRUPTIVE, NON-FUNCTIONAL    | c.427G>A (p.Val143Met) 34%        |
| TP53 | NON-DISRUPTIVE, NON-FUNCTIONAL    | c.536A>G (p.His179Arg) 13%        |
| TP53 | NON-DISRUPTIVE, NON-FUNCTIONAL    | c.736A>G (p.Met246Val) 72%        |
| TP53 | NON-DISRUPTIVE, NON-FUNCTIONAL    | c.818G>T (p.Arg273Leu) 23%        |
| TP53 | NON-DISRUPTIVE, NON-FUNCTIONAL    | c.844C>T (p.Arg282Trp) 4%         |
| TP53 | NON-DISRUPTIVE, NON-FUNCTIONAL    | c.995T>A (p.Ile332Asn) 37%        |
| TP53 | NON-DISRUPTIVE, NON-FUNCTIONAL    | c.833C>G (p.Pro278Arg) 55%        |
| TP53 | NON-DISRUPTIVE, NON-FUNCTIONAL    | c.488A>G (p.Tyr163Cys) 10%        |
| TP53 | NON-DISRUPTIVE, NON-FUNCTIONAL    | c.475G>C (p.Ala159Pro) 10%        |
| TP53 | NON-DISRUPTIVE, NON-FUNCTIONAL    | c.473G>T (p.Arg158Leu) 12%        |
| TP53 | NON-DISRUPTIVE, NON-FUNCTIONAL    | c.461G>T (p.Gly154Val) 16%        |
| TP53 | NON-DISRUPTIVE, NON-FUNCTIONAL    | c.469G>T (p.Val157Phe) 21%        |
| TP53 | NON-DISRUPTIVE, NON-FUNCTIONAL    | c.839G>C (p.Arg280Thr) 50%        |
| TP53 | NON-DISRUPTIVE, NON-FUNCTIONAL    | c.536A>G (p.His179Arg) 25%        |
| TP53 | NON-DISRUPTIVE, NON-FUNCTIONAL    | c.701A>G (p.Tyr234Cys) 18%        |
| TP53 | NON-DISRUPTIVE, NON-FUNCTIONAL    | c.473G>T (p.Arg158Leu) 48%        |
| TP53 | NON-DISRUPTIVE, NON-FUNCTIONAL    | c.821T>G (p.Val274Gly) 42%        |
| TP53 | NON-DISRUPTIVE, NON-FUNCTIONAL    | c.1081G>T (p.Gly361Trp) 44%       |
| TP53 | NON-DISRUPTIVE, NON-FUNCTIONAL    | c.818G>C (p.Arg273Pro) 43%        |
| TP53 | NON-DISRUPTIVE, NON-FUNCTIONAL    | c.404G>A (p.Cys135Tyr) 61%        |
| TP53 | NON-DISRUPTIVE, NON-FUNCTIONAL    | c.536A>G (p.His179Arg) 40%        |
| TP53 | NON-DISRUPTIVE, NON-FUNCTIONAL    | c.473G>T (p.Arg158Leu)            |
| TP53 | NON-DISRUPTIVE, NON-FUNCTIONAL    | c.856G>A (p.Glu286Lys) 29%        |
| TP53 | NON-DISRUPTIVE, NON-FUNCTIONAL    | c.644G>T (p.Ser215Ile)            |

|      |                                |                              |
|------|--------------------------------|------------------------------|
| TP53 | NON-DISRUPTIVE, NON-FUNCTIONAL | c.473G>C (p.Arg158Pro) 13%   |
| TP53 | NON-DISRUPTIVE, NON-FUNCTIONAL | c.469G>T (p.Val157Phe) 13%   |
| TP53 | NON-DISRUPTIVE, NON-FUNCTIONAL | c.716A>G (p. Asn239Ser) 45%  |
| TP53 | NON-DISRUPTIVE, NON-FUNCTIONAL | c.817C>T (p. Arg273Cis) 25%  |
| TP53 | NON-DISRUPTIVE, NON-FUNCTIONAL | c.650T>G (p. Val217Gly) 20%  |
| TP53 | NON-DISRUPTIVE, NON-FUNCTIONAL | c.469G>T (p.Val157Phe) 75%   |
| TP53 | NON-DISRUPTIVE, NON-FUNCTIONAL | c.475G>C (p.Ala159Pro) 23%   |
| TP53 | NON-DISRUPTIVE, NON-FUNCTIONAL | c.734G>T (p.Gly245Val)       |
| TP53 | NON-DISRUPTIVE, NON-FUNCTIONAL | c.473G>T (p.Arg158Leu) 62%   |
| TP53 | NON-DISRUPTIVE, NON-FUNCTIONAL | c.838A>G (p.Arg280Gly) 17%   |
| TP53 | NON-DISRUPTIVE, NON-FUNCTIONAL | c.638G>T (p. Arg213Leu) 13%  |
| TP53 | NON-DISRUPTIVE, NON-FUNCTIONAL | c.454C>A (p.Pro152Thr) (60%) |
| TP53 | NON-DISRUPTIVE, NON-FUNCTIONAL | c.841G>A (p.Asp281Asn) 9%    |
| TP53 | NON-DISRUPTIVE, NON-FUNCTIONAL | c.736A>G (p.Met246Val) 18%   |
| TP53 | NON-DISRUPTIVE, NON-FUNCTIONAL | c.797G>A (p.Gly266Glu) 50%   |
| TP53 | NON-DISRUPTIVE, NON-FUNCTIONAL | c.722C>G (p.Ser241Cys) 35%   |
| TP53 | NON-DISRUPTIVE, NON-FUNCTIONAL | c.469G>T (p.Val157Phe)       |
| TP53 | NON-DISRUPTIVE, NON-FUNCTIONAL | c.313G>T (p.Gly105Cys) 27%   |
| TP53 | NON-DISRUPTIVE, NON-FUNCTIONAL | c.469G>T (p.Val157Phe)       |
| TP53 | NON-DISRUPTIVE, NON-FUNCTIONAL | c.646G>A (p.Val216Met) 83%   |
| TP53 | NON-DISRUPTIVE, NON-FUNCTIONAL | c.814G>A (p.Val272Met) 49%   |
| TP53 | NON-DISRUPTIVE, NON-FUNCTIONAL | c.581T>G (p.Leu194Arg) 64%   |
| TP53 | NON-DISRUPTIVE, NON-FUNCTIONAL | c.476C>T (p.Ala159Val) 55%   |
| TP53 | NON-DISRUPTIVE, NON-FUNCTIONAL | c.818G>T (p.Arg273Leu) 31%   |
| TP53 | NON-DISRUPTIVE, NON-FUNCTIONAL | c.848G>C (p.Arg283Pro) (26%) |
| TP53 | NON-DISRUPTIVE, NON-FUNCTIONAL | c.844C>T (p.Arg282Trp) 6%    |
| TP53 | NON-DISRUPTIVE, NON-FUNCTIONAL | c.404G>A (p.Cys135Tyr) 36%   |
| TP53 | NON-DISRUPTIVE, NON-FUNCTIONAL | c.313G>C (p.Gly105Arg) 15%   |
| TP53 | NON-DISRUPTIVE, NON-FUNCTIONAL | c.809T>C (p.Phe270Ser) 28%   |
| TP53 | NON-DISRUPTIVE, NON-FUNCTIONAL | c.818G>C (p.Arg273Pro) 82%   |
| TP53 | NON-DISRUPTIVE, NON-FUNCTIONAL | c.338T>G (p.Phe113Cys)       |
| TP53 | NON-DISRUPTIVE, NON-FUNCTIONAL | c.641A>G (p.His214Arg)       |
| TP53 | NON-DISRUPTIVE, NON-FUNCTIONAL | c.853G>A (p.Glu285Lys) 28%   |
| TP53 | NON-DISRUPTIVE, NON-FUNCTIONAL | c.473G>T (p.Arg158Leu) 12%   |
| TP53 | NON-DISRUPTIVE, NON-FUNCTIONAL | c.833C>T (p.Pro278Leu) 17%   |
| TP53 | NON-DISRUPTIVE, NON-FUNCTIONAL | c.830G>T (p.Cys277Phe) 22%   |
| TP53 | NON-DISRUPTIVE, NON-FUNCTIONAL | c.467G>C (p.Arg156Pro) 7%    |
| TP53 | NON-DISRUPTIVE, NON-FUNCTIONAL | c.374C>T (p.Thr125Met) 55%   |
| TP53 | NON-DISRUPTIVE, NON-FUNCTIONAL | c.396G>C (p.Lys132Asn) 19%   |
| TP53 | NON-DISRUPTIVE, NON-FUNCTIONAL | c.581T>G (p.Leu194Arg) 37%   |
| TP53 | NON-DISRUPTIVE, NON-FUNCTIONAL | c.581T>G (p.Leu194Arg) 41%   |
| TP53 | NON-DISRUPTIVE, NON-FUNCTIONAL | c.1009C>T (p.Arg337Cys) 30%  |
| TP53 | NON-DISRUPTIVE, NON-FUNCTIONAL | c.794T>G (p.Leu265Arg) 18%   |
| TP53 | NON-DISRUPTIVE, NON-FUNCTIONAL | c.646G>T (p.Val216Leu) 8%    |
| TP53 | NON-DISRUPTIVE, NON-FUNCTIONAL | c.820G>T (p.Val274Phe) 21%   |
| TP53 | NON-DISRUPTIVE, NON-FUNCTIONAL | c.731G>T (p.Gly244Val) 88%   |
| TP53 | NON-DISRUPTIVE, NON-FUNCTIONAL | c.818G>T (p.Arg273Leu) 48%   |

|      |                                |                                                                   |
|------|--------------------------------|-------------------------------------------------------------------|
| TP53 | NON-DISRUPTIVE, NON-FUNCTIONAL | c.818G>C (p.Arg273Pro) 28%                                        |
| TP53 | NON-DISRUPTIVE, NON-FUNCTIONAL | c.580C>T (p.Leu194Phe) 9%                                         |
| TP53 | NON-DISRUPTIVE, NON-FUNCTIONAL | c.731G>T (p.Gly244Val) 12%                                        |
| TP53 | NON-DISRUPTIVE, NON-FUNCTIONAL | c.830G>T (p.Cys277Phe) 15%                                        |
| TP53 | NON-DISRUPTIVE, NON-FUNCTIONAL | c.848G>C (p.Arg283Pro) 46%                                        |
| TP53 | NON-DISRUPTIVE, NON-FUNCTIONAL | c.473G>T (p.Arg158Leu) 35%                                        |
| TP53 | NON-DISRUPTIVE, NON-FUNCTIONAL | c.646G>A (p.Val216Met) 12%                                        |
| TP53 | NON-DISRUPTIVE, NON-FUNCTIONAL | c.503A>G (p.His168Arg) 18%                                        |
| TP53 | NON-DISRUPTIVE, NON-FUNCTIONAL | c.578T>G (p.His193Arg) 30%                                        |
| TP53 | NON-DISRUPTIVE, NON-FUNCTIONAL | c.1010G>T (p.Arg337Leu) 97%                                       |
| TP53 | NON-DISRUPTIVE, NON-FUNCTIONAL | c.517G>A (p.Val173Met) 43%                                        |
| TP53 | NON-DISRUPTIVE, NON-FUNCTIONAL | c.743G>T (p.Arg248Leu)                                            |
| TP53 | NON-DISRUPTIVE, NON-FUNCTIONAL | c.484A>T (p.Ile162Phe) 7%                                         |
| TP53 | NON-DISRUPTIVE, NON-FUNCTIONAL | c.796G>A (p.Gly266Arg) 30%                                        |
| TP53 | NON-DISRUPTIVE, NON-FUNCTIONAL | c.743G>T (p.Arg248Leu) 8%                                         |
| TP53 | NON-DISRUPTIVE, NON-FUNCTIONAL | c.614A>G (p.Tyr205Cys)                                            |
| TP53 | NON-DISRUPTIVE, NON-FUNCTIONAL | c.848G>C (p.Arg283Pro) 47%                                        |
| TP53 | NON-DISRUPTIVE, NON-FUNCTIONAL | c.658T>C (p.Tyr220His) 26%                                        |
| TP53 | NON-DISRUPTIVE, NON-FUNCTIONAL | c.332T>C (p.Leu111Pro) 28%                                        |
| TP53 | NON-DISRUPTIVE, NON-FUNCTIONAL | c.843C>G (p.Asp281Glu) 5%                                         |
| TP53 | NON-DISRUPTIVE, NON-FUNCTIONAL | c.812A>T (p.Glu271Val) 6%                                         |
| TP53 | NON-DISRUPTIVE, NON-FUNCTIONAL | c.818G>T (p.Arg273Leu) 6%                                         |
| TP53 | NON-DISRUPTIVE, NON-FUNCTIONAL | c.514G>T (p.Val172Phe) 26%                                        |
| TP53 | NON-DISRUPTIVE, NON-FUNCTIONAL | c.830G>T (p.Cys277Phe) 44%                                        |
| TP53 | NON-DISRUPTIVE, NON-FUNCTIONAL | c.473G>T (p.Arg158Leu) 24%                                        |
| TP53 | NON-DISRUPTIVE, NON-FUNCTIONAL | c.527G>A (p.Cys176Tyr) 34%                                        |
| TP53 | NON-DISRUPTIVE, NON-FUNCTIONAL | c.818G>T (p.Arg273Leu) 12%                                        |
| TP53 | NON-DISRUPTIVE, NON-FUNCTIONAL | c.638G>A (p.Arg213Gln) 5%                                         |
| TP53 | NON-DISRUPTIVE, NON-FUNCTIONAL | c.469G>T (p.Val157Phe) 27%                                        |
| TP53 | NON-DISRUPTIVE, NON-FUNCTIONAL | c.722C>A (p.Ser241Tyr) 26%                                        |
| TP53 | NON-DISRUPTIVE, NON-FUNCTIONAL | c.770_779delinsCGGAAGACTT (p.Leu257_Ser260delinsProGluAspPhe) 10% |
| TP53 | NON-DISRUPTIVE, NON-FUNCTIONAL | c.614A>G (p.Tyr205Cys) 84%                                        |
| TP53 | NON-DISRUPTIVE, NON-FUNCTIONAL | c.475G>C (p.Ala159Pro) 17%                                        |
| TP53 | NON-DISRUPTIVE, NON-FUNCTIONAL | c.328C>T (p.Arg110Cys) 8%                                         |
| TP53 | NON-DISRUPTIVE, NON-FUNCTIONAL | c.859G>T (p.Glu287*) 12%                                          |
| TP53 | NON-DISRUPTIVE, NON-FUNCTIONAL | c.707A>G (p.Tyr236Cys) (45%)                                      |
| TP53 | NON-DISRUPTIVE, NON-FUNCTIONAL | c.824G>T (p.Cys275Phe) 24%                                        |
| TP53 | NON-DISRUPTIVE, NON-FUNCTIONAL | c.853G>A (p.Glu285Lys) 86%                                        |
| TP53 | NON-DISRUPTIVE, NON-FUNCTIONAL | c.517G>T (p.Val173Leu) 89%                                        |
| TP53 | NON-DISRUPTIVE, NON-FUNCTIONAL | c.517G>C (p.Val173Leu) 26%                                        |
| TP53 | NON-DISRUPTIVE, NON-FUNCTIONAL | c.517G>C (p.Val173Leu) 8%                                         |
| TP53 | NON-DISRUPTIVE, NON-FUNCTIONAL | c.743G>T (p.Arg248Leu) 10%                                        |
| TP53 | NON-DISRUPTIVE, NON-FUNCTIONAL | c.814G>T (p.Val272Leu) 14%                                        |
| TP53 | NON-DISRUPTIVE, NON-FUNCTIONAL | c.812A>T (p.Glu271Val) 41%                                        |
| TP53 | NON-DISRUPTIVE, NON-FUNCTIONAL | c.818G>T (p.Arg273Leu) 30%                                        |
| TP53 | NON-DISRUPTIVE, NON-FUNCTIONAL | c.701A>G (p.Tyr234Cys)                                            |
| TP53 | NON-DISRUPTIVE, NON-FUNCTIONAL | c.832C>A (p.Pro278Thr) 47%                                        |



|      |                                |                                        |
|------|--------------------------------|----------------------------------------|
| TP53 | NON-DISRUPTIVE, NON-FUNCTIONAL | c.482C>A (p.Ala161Asp) 7%              |
| TP53 | NON-DISRUPTIVE, NON-FUNCTIONAL | c.743G>T (p. Arg248Leu) 26%            |
| TP53 | NON-DISRUPTIVE, NON-FUNCTIONAL | c.398T>A (p.Met133Lys) 17%             |
| TP53 | NON-DISRUPTIVE, NON-FUNCTIONAL | c.398T>A (p.Met133Lys) 37%             |
| TP53 | NON-DISRUPTIVE, NON-FUNCTIONAL | c.817C>T (p.Arg273Cys) 71%             |
| TP53 | NON-DISRUPTIVE, NON-FUNCTIONAL | c.536A>G (p.His179Arg)                 |
| TP53 | NON-DISRUPTIVE, NON-FUNCTIONAL | c.853G>A (p.Glu285Lys) 19%             |
| TP53 | NON-DISRUPTIVE, NON-FUNCTIONAL | c.730G>A (p.Gly244Ser) 43%             |
| TP53 | NON-DISRUPTIVE, NON-FUNCTIONAL | c.461G>T (p.Gly154Val) 23%             |
| TP53 | NON-DISRUPTIVE, NON-FUNCTIONAL | c.517G>C (p.Val173Leu) 49%             |
| TP53 | NON-DISRUPTIVE, NON-FUNCTIONAL | c.814G>T (p.Val272Leu) 9%              |
| TP53 | NON-DISRUPTIVE, NON-FUNCTIONAL | c.470T>G (p.Val157Gly) 56%             |
| TP53 | NON-DISRUPTIVE, NON-FUNCTIONAL | c.473G>T (p.Arg158Leu) 38%             |
| TP53 | NON-DISRUPTIVE, NON-FUNCTIONAL | c.469G>T (p.Val157Phe) 21%             |
| TP53 | NON-DISRUPTIVE, NON-FUNCTIONAL | c.797G>T (p.Gly266Val) 7%              |
| TP53 | NON-DISRUPTIVE, NON-FUNCTIONAL | c.853G>A (p.Glu285Lys) 56%             |
| TP53 | NON-DISRUPTIVE, NON-FUNCTIONAL | c.461G>T (p.Gly154Val)                 |
| TP53 | NON-DISRUPTIVE, NON-FUNCTIONAL | c.455C>T (p. Pro152Leu) 33%            |
| TP53 | NON-DISRUPTIVE, NON-FUNCTIONAL | c.473G>C (p.Arg158Pro) 48%             |
| TP53 | NON-DISRUPTIVE, NON-FUNCTIONAL | c.832C>A (p.Pro278Thr) 36%             |
| TP53 | NON-DISRUPTIVE, NON-FUNCTIONAL | c.451C>A (p. Pro151Thr) 46%            |
| TP53 | NON-DISRUPTIVE, NON-FUNCTIONAL | c.823T>C (p.Cys275Arg) 34%             |
| TP53 | NON-DISRUPTIVE, NON-FUNCTIONAL | c.473G>T (p.Arg158Leu) 7%              |
| TP53 | NON-DISRUPTIVE, NON-FUNCTIONAL | c.380C>T (p.Ser127Phe) 78%             |
| TP53 | NON-DISRUPTIVE, NON-FUNCTIONAL | c.818G>T (p.Arg273Leu) 39%             |
| TP53 | NON-DISRUPTIVE, NON-FUNCTIONAL | c.473G>T (p.Arg158Leu) 46%             |
| TP53 | NON-DISRUPTIVE, NON-FUNCTIONAL | c.581T>G (p.Leu194Arg) 73%             |
| TP53 | NON-DISRUPTIVE, NON-FUNCTIONAL | c.106_108delCCG (p.Pro36del) 10%       |
| TP53 | NON-DISRUPTIVE, NON-FUNCTIONAL | c.817C>A (p.Arg273Ser) 26%             |
| TP53 | NON-DISRUPTIVE, NON-FUNCTIONAL | c.461_462delGCinsTT (p. Gly154Val) 26% |
| TP53 | NON-DISRUPTIVE, NON-FUNCTIONAL | c.817C>A (p.Arg273Ser) 34%             |
| TP53 | NON-DISRUPTIVE, NON-FUNCTIONAL | c.808T>C (p.Phe270Leu) 6%              |
| TP53 | NON-DISRUPTIVE, NON-FUNCTIONAL | c.469G>T (p.Val157Phe) (31%)           |
| TP53 | NON-DISRUPTIVE, NON-FUNCTIONAL | c.578A>G (p.His193Arg) 20%             |
| TP53 | NON-DISRUPTIVE, NON-FUNCTIONAL | c.473G>T (p.Arg158Leu) 59%             |
| TP53 | NON-DISRUPTIVE, NON-FUNCTIONAL | c.581T>A (p.Leu194His) 16%             |
| TP53 | NON-DISRUPTIVE, NON-FUNCTIONAL | c.412G>C (p.Ala138Pro) 23%             |
| TP53 | NON-DISRUPTIVE, NON-FUNCTIONAL | c.1031T>G (p.Leu344Arg)                |
| TP53 | NON-DISRUPTIVE, NON-FUNCTIONAL | c.583A>T (p.Ile195Phe) 43%             |
| TP53 | NON-DISRUPTIVE, NON-FUNCTIONAL | c.853G>A (p.Glu285Lys) 27%             |
| TP53 | NON-DISRUPTIVE, NON-FUNCTIONAL | c.818G>T (p.Arg273Leu) 58%             |
| TP53 | NON-DISRUPTIVE, NON-FUNCTIONAL | c.379T>C (p.Ser127Pro) 57%             |
| TP53 | NON-DISRUPTIVE, NON-FUNCTIONAL | c.641A>G (p.His214Arg) 15%             |
| TP53 | NON-DISRUPTIVE, NON-FUNCTIONAL | c.817C>T (p.Arg273Cys)                 |
| TP53 | NON-DISRUPTIVE, NON-FUNCTIONAL | c.380C>T (p.Ser127Phe) 24%             |
| TP53 | NON-DISRUPTIVE, NON-FUNCTIONAL | c.711G>C (p.Met237Ile) 34%             |
| TP53 | NON-DISRUPTIVE, NON-FUNCTIONAL | c.469G>T (p.Val157Phe) 14%             |

|      |                                |                            |
|------|--------------------------------|----------------------------|
| TP53 | NON-DISRUPTIVE, NON-FUNCTIONAL | c.773A>C (p.Glu258Ala)     |
| TP53 | NON-DISRUPTIVE, NON-FUNCTIONAL | c.716A>G (p.Asn239Ser) 21% |
| TP53 | NON-DISRUPTIVE, NON-FUNCTIONAL | c.725G>A (p.Cys242Tyr) 23% |
| TP53 | NON-DISRUPTIVE, NON-FUNCTIONAL | c.514G>T (p.Val172Phe) 43% |
| TP53 | NON-DISRUPTIVE, NON-FUNCTIONAL | c.707A>G (p.Tyr236Cys)     |
| TP53 | NON-DISRUPTIVE, NON-FUNCTIONAL | c.469G>T (p.Val157Phe)     |
| TP53 | NON-DISRUPTIVE, NON-FUNCTIONAL | c.772G>A (p.Glu258Lys)     |
| TP53 | NON-DISRUPTIVE, NON-FUNCTIONAL | c.488A>G (p.Tyr163Cys) 14% |
| TP53 | NON-DISRUPTIVE, NON-FUNCTIONAL | c.581T>G (p.Leu194Arg)     |
| TP53 | NON-DISRUPTIVE, NON-FUNCTIONAL | c.423C>G (p.Cys141Trp) 51% |
| TP53 | NON-DISRUPTIVE, NON-FUNCTIONAL | c.469G>T (p.Val157Phe)     |
| TP53 | NON-DISRUPTIVE, NON-FUNCTIONAL | c.659A>G (p.Tyr220Cys) 13% |
| TP53 | NON-DISRUPTIVE, NON-FUNCTIONAL | c.734G>T (p.Gly245Val)     |
| TP53 | NON-DISRUPTIVE, NON-FUNCTIONAL | c.725G>C (p.Cys242Ser) 64% |
| TP53 | NON-DISRUPTIVE, NON-FUNCTIONAL | c.857A>T (p.Glu286Val)     |
| TP53 | NON-DISRUPTIVE, NON-FUNCTIONAL | c.461G>T (p.Gly154Val) 33% |
| TP53 | NON-DISRUPTIVE, NON-FUNCTIONAL | c.347C>G (p.Ser116Cys) 81% |
| TP53 | NON-DISRUPTIVE, NON-FUNCTIONAL | c.469G>T (p.Val157Phe) 20% |
| TP53 | NON-DISRUPTIVE, NON-FUNCTIONAL | c.659A>G (p.Tyr220Cys) 13% |
| TP53 | NON-DISRUPTIVE, NON-FUNCTIONAL | c.464C>A (p.Thr155Asn) 64% |
| TP53 | NON-DISRUPTIVE, NON-FUNCTIONAL | c.995T>G (p.Ile332Ser) 31% |
| TP53 | NON-DISRUPTIVE, NON-FUNCTIONAL | c.814G>C (p.Val272Leu) 43% |
| TP53 | NON-DISRUPTIVE, NON-FUNCTIONAL | c.396G>T (p.Lys132Asn) 63% |
| TP53 | NON-DISRUPTIVE, NON-FUNCTIONAL | c.374C>G (p.Thr125Arg) 35% |
| TP53 | NON-DISRUPTIVE, NON-FUNCTIONAL | c.707A>G (p.Tyr236Cys) 18% |
| TP53 | NON-DISRUPTIVE, NON-FUNCTIONAL | c.738G>T (p.Met246Ile) 15% |
| TP53 | NON-DISRUPTIVE, NON-FUNCTIONAL | c.644G>T (p.Ser215Ile) 76% |
| TP53 | NON-DISRUPTIVE, NON-FUNCTIONAL | c.796G>A (p.Gly266Arg) 85% |
| TP53 | NON-DISRUPTIVE, NON-FUNCTIONAL | c.818G>T (p.Arg273Leu) 33% |
| TP53 | NON-DISRUPTIVE, NON-FUNCTIONAL | c.470T>A (p.Val157Asp) 12% |
| TP53 | NON-DISRUPTIVE, NON-FUNCTIONAL | c.473G>T (p.Arg158Leu) 31% |
| TP53 | NON-DISRUPTIVE, NON-FUNCTIONAL | c.461G>T (p.Gly154Val) 74% |
| TP53 | NON-DISRUPTIVE, NON-FUNCTIONAL | c.646G>A (p.Val216Met) 14% |
| TP53 | NON-DISRUPTIVE, NON-FUNCTIONAL | c.856G>C (p.Glu286Gln) 80% |
| TP53 | NON-DISRUPTIVE, NON-FUNCTIONAL | c.461G>T (p.Gly154Val) 32% |
| TP53 | NON-DISRUPTIVE, NON-FUNCTIONAL | c.329G>C (p.Arg110Pro) 30% |
| TP53 | NON-DISRUPTIVE, NON-FUNCTIONAL | c.423C>G (p.Cys141Trp) 13% |
| TP53 | NON-DISRUPTIVE, NON-FUNCTIONAL | c.830G>T (p.Cys277Phe) 35% |
| TP53 | NON-DISRUPTIVE, NON-FUNCTIONAL | c.398T>C (p.Met133Thr) 34% |
| TP53 | NON-DISRUPTIVE, NON-FUNCTIONAL | c.643A>G (p.Ser215Gly) 26% |
| TP53 | NON-DISRUPTIVE, NON-FUNCTIONAL | c.711G>A (p.Met237Ile) 63% |
| TP53 | NON-DISRUPTIVE, NON-FUNCTIONAL | c.830G>T (p.Cys277Phe) 25% |
| TP53 | NON-DISRUPTIVE, NON-FUNCTIONAL | c.700T>C (p.Tyr234His) 94% |
| TP53 | NON-DISRUPTIVE, NON-FUNCTIONAL | c.473G>C (p.Arg158Pro) 30% |
| TP53 | NON-DISRUPTIVE, NON-FUNCTIONAL | c.707A>G (p.Tyr236Cys) 75% |
| TP53 | NON-DISRUPTIVE, NON-FUNCTIONAL | c.761T>C (p.Ile254Thr) 6%  |
| TP53 | NON-DISRUPTIVE, NON-FUNCTIONAL | c.469G>T (p.Val157Phe) 18% |

|      |                                |                                                                |
|------|--------------------------------|----------------------------------------------------------------|
| TP53 | NON-DISRUPTIVE, NON-FUNCTIONAL | c.514G>T (p.Val172Phe) 77%                                     |
| TP53 | NON-DISRUPTIVE, NON-FUNCTIONAL | c.514G>T (p.Val172Phe) 16%                                     |
| TP53 | NON-DISRUPTIVE, NON-FUNCTIONAL | c.824G>T (p.Cys275Phe) 19%                                     |
| TP53 | NON-DISRUPTIVE, NON-FUNCTIONAL | c.818G>T (p.Arg273Leu) 25%                                     |
| TP53 | NON-DISRUPTIVE, NON-FUNCTIONAL | c.461G>T (p.Gly154Val) 35%                                     |
| TP53 | NON-DISRUPTIVE, NON-FUNCTIONAL | c.1009C>T (p.Arg337Cys) 46%                                    |
| TP53 | NON-DISRUPTIVE, NON-FUNCTIONAL | c.391A>T (p.Asn131Tyr) 29%                                     |
| TP53 | NON-DISRUPTIVE, NON-FUNCTIONAL | c.818G>T (p.Arg273Leu) 14%                                     |
| TP53 | NON-DISRUPTIVE, NON-FUNCTIONAL | c.517G>T (p.Val173Leu) 39%                                     |
| TP53 | NON-DISRUPTIVE, NON-FUNCTIONAL | c.818G>T (p.Arg273Leu) 10%                                     |
| TP53 | NON-DISRUPTIVE, NON-FUNCTIONAL | c.1010G>T (p.Arg337Leu) 28%                                    |
| TP53 | NON-DISRUPTIVE, NON-FUNCTIONAL | c.722C>A (p.Ser241Tyr) 62%                                     |
| TP53 | NON-DISRUPTIVE, NON-FUNCTIONAL | c.380C>T (p.Ser127Phe) 82%                                     |
| TP53 | NON-DISRUPTIVE, NON-FUNCTIONAL | c.473G>T (p.Arg158Leu) 80%                                     |
| TP53 | NON-DISRUPTIVE, NON-FUNCTIONAL | c.469G>T (p.Val157Phe) 46%                                     |
| TP53 | NON-DISRUPTIVE, NON-FUNCTIONAL | c.464C>T (p.Thr155Ile) 32%                                     |
| TP53 | NON-DISRUPTIVE, NON-FUNCTIONAL | c.644G>T (p.Ser215Ile) 24%                                     |
| TP53 | NON-DISRUPTIVE, NON-FUNCTIONAL | c.736A>T (p.Met246Leu) 17%                                     |
| TP53 | NON-DISRUPTIVE, NON-FUNCTIONAL | c.701A>G (p.Tyr234Cys) 28%                                     |
| TP53 | NON-DISRUPTIVE, NON-FUNCTIONAL | c.853G>A (p.Glu285Lys) 46%                                     |
| TP53 | NON-DISRUPTIVE, NON-FUNCTIONAL | c.517G>A (p.Val173Met) 64%                                     |
| TP53 | NON-DISRUPTIVE, NON-FUNCTIONAL | c.329G>C (p.Arg110Pro) 25%                                     |
| TP53 | NON-DISRUPTIVE, NON-FUNCTIONAL | c.578A>G (p.His193Arg) 25%                                     |
| TP53 | NON-DISRUPTIVE, NON-FUNCTIONAL | c.461G>T (p.Gly154Val) 13%                                     |
| TP53 | NON-DISRUPTIVE, NON-FUNCTIONAL | c.646G>T (p.Val216Leu) 42%                                     |
| TP53 | NON-DISRUPTIVE, NON-FUNCTIONAL | c.711G>A (p.Met237Ile) 17%                                     |
| TP53 | NON-DISRUPTIVE, NON-FUNCTIONAL | c.376T>A (p.Tyr126Asn) 90%                                     |
| TP53 | NON-DISRUPTIVE, NON-FUNCTIONAL | c.396G>C (p.Lys132Asn) 13%                                     |
| TP53 | NON-DISRUPTIVE, NON-FUNCTIONAL | c.701A>G (p.Tyr234Cys) 5%                                      |
| TP53 | NON-DISRUPTIVE, NON-FUNCTIONAL | c.313G>T (p.Gly105Cys) 67%                                     |
| TP53 | NON-DISRUPTIVE, NON-FUNCTIONAL | c.818G>T (p.Arg273Leu) 21%                                     |
| TP53 | NON-DISRUPTIVE, NON-FUNCTIONAL | c.638G>A (p.Arg213Gln) 60%                                     |
| TP53 | NON-DISRUPTIVE, NON-FUNCTIONAL | c.380C>A (p.Ser127Tyr) 15%                                     |
| TP53 | NON-DISRUPTIVE, NON-FUNCTIONAL | c.853G>A (p.Glu285Lys) 38%                                     |
| TP53 | NON-DISRUPTIVE, NON-FUNCTIONAL | c.814G>T (p.Val272Leu) 29%                                     |
| TP53 | NON-DISRUPTIVE, NON-FUNCTIONAL | c.578A>G (p.His193Arg) 68%                                     |
| TP53 | NON-DISRUPTIVE, NON-FUNCTIONAL | c.995T>A (p.Ile332Asn) 11%                                     |
| TP53 | NON-DISRUPTIVE, NON-FUNCTIONAL | c.824G>T (p.Cys275Phe) 10%                                     |
| TP53 | NON-DISRUPTIVE, NON-FUNCTIONAL | c.736A>T (p.Met246Leu) 26%                                     |
| TP53 | NON-DISRUPTIVE, NON-FUNCTIONAL | c.454C>T (p.Pro152Ser) 25%                                     |
| TP53 | NON-DISRUPTIVE, NON-SENSE      | c.139C>T (p.Pro47Ser) 97%                                      |
| TP53 | NON-DISRUPTIVE, NOS            | c.646_651 delGTGGTGinsTTGGGT (p.Val216_Val217delinsLeuGly) 52% |
| TP53 | NON-DISRUPTIVE, NOS            | c.530C>T (p.Pro177Leu) 28%                                     |
| TP53 | NON-DISRUPTIVE, NOS            | c.844C>G (p.Arg282Gly) 25%                                     |
| TP53 | NON-DISRUPTIVE, NOS            | c.659A>G (p.Tyr220Cys) 13%                                     |
| TP53 | NON-DISRUPTIVE, NOS            | c.797G>A (p.Gly266Glu) 63%                                     |
| TP53 | NON-DISRUPTIVE, NOS            | c.947C>T (p.Pro316Leu) 48%                                     |

|      |                     |                                                       |
|------|---------------------|-------------------------------------------------------|
| TP53 | NON-DISRUPTIVE, NOS | c.329G>T (p.Arg110Leu) 49%                            |
| TP53 | NON-DISRUPTIVE, NOS | c.659A>G (p. Tyr220Cys) 28%                           |
| TP53 | NON-DISRUPTIVE, NOS | c.450_455delACCCCC (p.Pro152_Pro153del) 54%           |
| TP53 | NON-DISRUPTIVE, NOS | c.772G>C (p.Glu258Gln) 21%                            |
| TP53 | NON-DISRUPTIVE, NOS | c.127T>G (p.Leu43Val) 32%                             |
| TP53 | NON-DISRUPTIVE, NOS | c.659A>G (p.Tyr220Cys) 13%                            |
| TP53 | NON-DISRUPTIVE, NOS | c.826G>T (p.Ala276Ser) 13%                            |
| TP53 | NON-DISRUPTIVE, NOS | c.614A>T (p.Tyr205Phe) 12%                            |
| TP53 | NON-DISRUPTIVE, NOS | c.476C>T (p.Ala159Val) 15%                            |
| TP53 | NON-DISRUPTIVE, NOS | c.480_481delGGinsTT (p.Met160_Ala161delinsIleSer) 20% |
| TP53 | NON-DISRUPTIVE, NOS | c.457_459delCCC (p.Pro153del)                         |
| TP53 | NON-DISRUPTIVE, NOS | c.841G>C (p.Asp281His) 58%                            |
| TP53 | NON-DISRUPTIVE, NOS | c.404G>T (p.Cys135Phe) 28%                            |
| TP53 | NON-DISRUPTIVE, NOS | c.419_427delCTGCCCTG (p.Thr140_Val143delinsMet) 26%   |
| TP53 | NON-DISRUPTIVE, NOS | c.973G>A (p.Gly325Arg) 25%                            |
| TP53 | NON-DISRUPTIVE, NOS | c.376_381delTACTCC (p.Tyr126_Ser127del) 31%           |
| TP53 | NON-DISRUPTIVE, NOS | c.473G>T (p. Arg158Leu) 32%                           |
| TP53 | NON-DISRUPTIVE, NOS | c.730G>T (p.Gly244Cys) 15%                            |
| TP53 | NON-DISRUPTIVE, NOS | c.812_826delAGGTGCGTGTGTTGTG (p.Glu271_Cys275del) 20% |
| TP53 | NON-DISRUPTIVE, NOS | c.401_406dupTTTGCC (p.Cys135_Gln136insLeuCys) 16%     |
| TP53 | NON-DISRUPTIVE, NOS | c.756_770delCACCATCATCACA (p.Thr253_Leu257del)        |
| TP53 | NON-DISRUPTIVE, NOS | c.994-1G>A (p.?) 36%                                  |
| TP53 | NON-DISRUPTIVE, NOS | c.91G>A (p. Val31Ile) 30%                             |
| TP53 | NON-DISRUPTIVE, NOS | c.841G>C (p.Asp281His) 25%                            |
| TP53 | NON-DISRUPTIVE, NOS | c.393_395delCAA (p.Asn131del) 42%                     |
| TP53 | NON-DISRUPTIVE, NOS | c.376-2A>G (p. ?) 42%                                 |
| TP53 | NON-DISRUPTIVE, NOS | c.818G>A (p.Arg273His) 44%                            |
| TP53 | NON-DISRUPTIVE, NOS | c.659A>G (p.Tyr220Cys) 31%                            |
| TP53 | NON-DISRUPTIVE, NOS | c.856G>A (p.Glu286Lys) 26%                            |
| TP53 | NON-DISRUPTIVE, NOS | c.383_391delCTGCCCTCA (p. Pro128_Asn131delinsHis) 10% |
| TP53 | NON-DISRUPTIVE, NOS | c.659A>G (p.Tyr220Cys) 68%                            |
| TP53 | NON-DISRUPTIVE, NOS | c.839G>A (p.Arg280Lys) 43%                            |
| TP53 | NON-DISRUPTIVE, NOS | c.747G>C (p.Arg249Ser) 12%                            |
| TP53 | NON-DISRUPTIVE, NOS | c.586C>G (p.Arg196Gly) 26%                            |
| TP53 | NON-DISRUPTIVE, NOS | c.797G>A (p.Gly266Glu) 50%                            |
| TP53 | NON-DISRUPTIVE, NOS | c.476C>T (p.Ala159Val)                                |
| TP53 | NON-DISRUPTIVE, NOS | c.476C>T (p.Ala159Val) 30%                            |
| TP53 | NON-DISRUPTIVE, NOS | c.659A>G (p.Tyr220Cys) 71%                            |
| TP53 | NON-DISRUPTIVE, NOS | c.404G>T (p.Cys135Phe)                                |
| TP53 | NON-DISRUPTIVE, NOS | c.329G>T (p.Arg110Leu) 18%                            |
| TP53 | NON-DISRUPTIVE, NOS | c.467G>C (p.Arg156Pro) 23%                            |
| TP53 | NON-DISRUPTIVE, NOS | c.839G>A (p.Arg280Lys)                                |
| TP53 | NON-DISRUPTIVE, NOS | c.659A>G (p. Tyr220Cys) 39%                           |
| TP53 | NON-DISRUPTIVE, NOS | c.847C>T (p.Arg283Cys) 57%                            |
| TP53 | NON-DISRUPTIVE, NOS | c.1053_1054delinsCT (p.Lys351_Asp352delinsAsnTyr) 30% |
| TP53 | NON-DISRUPTIVE, NOS | c.393_395delCAA (p.Asn131del)                         |
| TP53 | NON-DISRUPTIVE, NOS | c.773A>C (p.Glu258Ala) 33%                            |

|      |                                      |                                               |
|------|--------------------------------------|-----------------------------------------------|
| TP53 | NON-DISRUPTIVE, NOS                  | c.1001_1006delGGCGTG (p.Gly334_Arg335del) 85% |
| TP53 | NON-DISRUPTIVE, NOS                  | c.622G>A (p.Asp208Asn) 15%                    |
| TP53 | NON-DISRUPTIVE, NOS                  | c.329G>T (p.Arg110Leu) 36%                    |
| TP53 | NON-DISRUPTIVE, NOS                  | c.842A>T (p.Asp281Val) 69%                    |
| TP53 | NON-DISRUPTIVE, NOS                  | c.329G>T (p.Arg110Leu) 80%                    |
| TP53 | NON-DISRUPTIVE, NOS                  | c.821_826delTTTGTG (p.Val274_Cys275del) 36%   |
| TP53 | NON-DISRUPTIVE, NOS                  | c.659A>G (p.Tyr220Cys) 21%                    |
| TP53 | NON-DISRUPTIVE, PARTIALLY FUNCTIONAL | c.640C>T (p.His214Tyr) 61%                    |
| TP53 | NON-DISRUPTIVE, PARTIALLY FUNCTIONAL | c.542G>A (p.Arg181His) (10%)                  |
| TP53 | NON-DISRUPTIVE, PARTIALLY FUNCTIONAL | c.587G>A (p.Arg196Gln) 20%                    |
| TP53 | NON-DISRUPTIVE, PARTIALLY FUNCTIONAL | c.1010G>A (p.Arg337His) 11%                   |
| TP53 | NON-DISRUPTIVE, PARTIALLY FUNCTIONAL | c.480G>A (p.Met160Ile) 72%                    |
| TP53 | NON-DISRUPTIVE, PARTIALLY FUNCTIONAL | c.569C>T (p.Pro190Leu) 12%                    |
| TP53 | NON-DISRUPTIVE, PARTIALLY FUNCTIONAL | c.405C>G (p.Cys135Trp) 10%                    |
| TP53 | NON-DISRUPTIVE, PARTIALLY FUNCTIONAL | c.608T>A (p.Val203Glu) 39%                    |
| TP53 | NON-DISRUPTIVE, PARTIALLY FUNCTIONAL | c.607G>T (p.Val203Leu) 56%                    |
| TP53 | NON-DISRUPTIVE, PARTIALLY FUNCTIONAL | c.569C>T (p.Pro190Leu) 9%                     |
| TP53 | NON-DISRUPTIVE, PARTIALLY FUNCTIONAL | c.166G>A (p.Glu56Lys) 46%                     |
| TP53 | NON-DISRUPTIVE, PARTIALLY FUNCTIONAL | c.413C>T (p.Ala138Val) 24%                    |
| TP53 | NON-DISRUPTIVE, PARTIALLY FUNCTIONAL | c.413C>T (p.Ala138Val) 5%                     |
| TP53 | NON-DISRUPTIVE, PARTIALLY FUNCTIONAL | c.587G>A (p.Arg196Gln) 37%                    |
| TP53 | NON-FUNCTIONAL                       | c.742C>T (p.Arg248Trp) 5%                     |
| TP53 | UNCLEAR                              | c.532delC (p.His178Thrfs*69) 24%              |
| TP53 | UNCLEAR                              | c.994-1G>C (p.?) 64%                          |
| TP53 | UNCLEAR                              | c.376-13_376delCCTCTTCCTACAGT (p. ) 23%       |
| TP53 | UNCLEAR                              | c.903delA (p.Ser303Alafs*42) 6%               |
| TP53 | UNCLEAR                              | c.321C>G (p.Tyr107*) 15%                      |
| TP53 | UNCLEAR                              | c.811G>T (p.Glu271*) 11%                      |
| TP53 | UNCLEAR                              | c.818G>T (p.Arg273Leu) 15%                    |
