# Supplementary material for: Upfront Next Generation Sequencing in Non-Small Cell Lung Cancer
Source: MDPI journal article supplement (doi:10.3390/curroncol29070352), 2022-06-22
Supplement: s1 [file s1]

**Supplementary Data S1.** Search terms used on ClinicalTrials.gov.

Search

Condition or disease

-Lung Neoplasm

AND

-Advanced Neoplasms

AND

-Thoracic Neoplasm

Other

-Gene name (*AKT1*, *BRAF*, *ERBB2*, *FOXL2*, *GNA11*, *GNAQ*, *KIT*, *KRAS*, *MET*, *NRAS*, *PDGFRA*, *PIK3CA*, *RET*, *TP53*)

Study Type

All

Study Results

All

Status Recruitment

-Recruiting

OR

-Enrolling by invitation

Eligibility Criteria

Age

-Adult (18-64)

AND

-Older Adult (65+)

Sex

-All

Location

-All
